# Supplementary material for: Double-Locking Mechanism of Self-Compatibility in Arabidopsis thaliana: The Synergistic Effect of Transcriptional Depression and Disruption of Coding Region in the Male Specificity Gene
Source: PubMed Central journal article supplement (PMC7517786; doi:10.3389/fpls.2020.576140), 2020-09-11
Supplement: DataSheet_1.pdf [file DataSheet_1.pdf]

Supplementary Table S1| List of primers

|                                          | primer name     | sequence (5'-3')                        |
|------------------------------------------|-----------------|-----------------------------------------|
| full length of <i>AhSCR</i>              | AhSCRpro-F      | AAGCTTGTTATTAATCTCCAAATTTGAGTCAATC      |
|                                          | AhSCR3'UTR-R    | GAGCTCGTGAAAAACATCGTGTAATCGTATTAG       |
| promoter of <i>AhSCR</i>                 | AhSCRpro-F      | AAGCTTGTTATTAATCTCCAAATTTGAGTCAATC      |
|                                          | AhSCRpro-R      | GGATCCATGTATGTTACAAGTTGTGTCTTTATATAGAGG |
| promoter of <i>AtSCR</i>                 | AtSCRpro-F      | AAGCTTGTAATCTATAATATATGGGGTCAAATTG      |
|                                          | AtSCRpro-R      | GGATCCGTGCATGTTGCAAGTTGTGT              |
| former part of <i>AhSCR</i> codin region | AhSCR5'UTR-F    | GGATCCAATACAGTAAGCTCTATCTTAAAAAGGTC     |
|                                          | Ah&AtSCRinner-R | CACATATACAGAGAGTAACCACACCTTCC           |
| latter part of <i>AhSCR</i> codin region | Ah&AtSCRinner-F | GGAAGGTGTGGTTACTCTCTGTATATGTG           |
|                                          | AhSCR3'UTR-R    | GAGCTCGTGAAAAACATCGTGTAATCGTATTAG       |
| former part of <i>AtSCR</i> codin region | AtSCR5'UTR-F    | GGATCCAATCCACTAAGTTCTATCTTAAAAAGGTC     |
|                                          | Ah&AtSCRinner-R | CACATATACAGAGAGTAACCACACCTTCC           |
| latter part of <i>AtSCR</i> codin region | Ah&AtSCRinner-F | GGAAGGTGTGGTTACTCTCTGTATATGTG           |
|                                          | AtSCRinv-R      | GAGCTCATTGCTAAGAATTCAGACCCTCTC          |
| 5'-RACE of <i>SCR-A</i>                  | SCR5'race-R     | CAAACCATAAAACAAAACAACACATCTCAT          |
| 3'-RACE of <i>SCR-A</i>                  | SCR3'race-F     | GGTGGAATTTGCTATTGTAAAAAATGCTTGGTTTAA    |
| qRT-PCR of <i>SCR-A</i>                  | SCR5'-F         | ATGAGATGTGTTGTTTTGTTTATGGTTTC           |
|                                          | SCR5'-R         | GTCTTCTTTGCATCGTAGTTTTGCG               |
| qRT-PCR of <i>SRK-A</i>                  | SRK-F           | GAAAGAATGTGAAGAGAAGTGCAAG               |
|                                          | SRK-R           | GAACAAGCATTAAGCTGATTCCA                 |
| 18S rRNA                                 | At18SrRNA-F     | GGGCATTCGTATTTTCATAGTCAGAG              |
|                                          | At18SrRNA-R     | CGGTTCTTGATTAATGAAAACATCCT              |
