# Supplementary material for: Double-Locking Mechanism of Self-Compatibility in Arabidopsis thaliana: The Synergistic Effect of Transcriptional Depression and Disruption of Coding Region in the Male Specificity Gene
Source: PubMed Central journal article supplement (PMC7517786; doi:10.3389/fpls.2020.576140), 2020-09-11
Supplement: DataSheet_3.pdf [file DataSheet_3.pdf]

|         |                                                                   |    |    |    |    |    |    |    |    |     |                                                                        |     |
|---------|-------------------------------------------------------------------|----|----|----|----|----|----|----|----|-----|------------------------------------------------------------------------|-----|
|         | 10                                                                | 20 | 30 | 40 | 50 | 60 | 70 | 80 | 90 | 100 |                                                                        |     |
|         | ----- ----- ----- ----- ----- ----- ----- ----- ----- ----- ----- |    |    |    |    |    |    |    |    |     |                                                                        |     |
| Col-0   | GATATTAATATATAAAATAGAAATAGAATAA                                   |    |    |    |    |    |    |    |    |     | TTCTAAAAATATTCTTTTTAAAGTAGAAAAATAGAGATATATATTGGAGAGTAAGATATAGAGCTATACT | 100 |
| C24     | GATATTAATATATAAAATAGAAATAGAATAA                                   |    |    |    |    |    |    |    |    |     | TTCTAAAAATATTCTTTTTAAAGTAGAAAAATAGAGATATATATTGGAGAGTAAGATATAGAGCTATACT | 100 |
| Ca-0    | GATATAAATATATAAAATAGAAATAGAATAA                                   |    |    |    |    |    |    |    |    |     | TTCTAAAAATATTCTTTTTAAAGTAGAAAAATAGAGATATACATTGGAGAGTAAGATATAGAGCTATACT | 100 |
| Gie-0   | GATATTAATATATAAAATAGAAATAGAATAA                                   |    |    |    |    |    |    |    |    |     | TTCTAAAAATATTCTTTTTAAAGTAGAAAAATAGAGATATACATTGGAGAGTAAGATATAGAGCTATACT | 100 |
| Old-1   | GATATTAATATATAAAATAGAAATAGAATAA                                   |    |    |    |    |    |    |    |    |     | TTCTAAAAATATTCTTTTTAAAGTAGAAAAATAGAGATATACATTGGAGAGTAAGATATAGAGCTATACT | 100 |
| Pog-0   | ----- ----- ----- ----- ----- ----- ----- ----- ----- ----- ----- |    |    |    |    |    |    |    |    |     | TTCTAAAAATATTCTTTTTAAAGTAGAAAAATAGAGATATACATTGGAGAGTAAGATATAGAGCTATACT | 69  |
| Ws-0    | GATATTAATATATAAAATAGAAATAGAATAA                                   |    |    |    |    |    |    |    |    |     | TTCTAAAAATATTCTTTTTAAAGTAGAAAAATAGAGATATATATTGGAGAGTAAGATATAGAGCTATACT | 100 |
| Da-1-12 | GATATTAATATATAAAATAGAAATAGAATAA                                   |    |    |    |    |    |    |    |    |     | TTCTAAAAATATTCTTTTTAAAGTAGAAAAATAGAGATATACATTGGAGAGTAAGATATAGAGCTATACT | 100 |
| Mz-0    | GATATTAATATATAAAATAGAAATAGAATAA                                   |    |    |    |    |    |    |    |    |     | TTCTAAAAATATTCTTTTTAAAGTAGAAAAATAGAGATATATATTGGAGAGTAAGATATAGAGCTATACT | 100 |
| Wa-1    | GATATTAATATATAAAATAGAAATAGAATAA                                   |    |    |    |    |    |    |    |    |     | TTCTAAAAATATTCTTTTTAAAGTAGAAAAATAGAGATATACATTGGAGAGTAAGATATAGAGCTATACT | 100 |
| La-0    | GATATTAATATATAAAATAGAAATAGAATAA                                   |    |    |    |    |    |    |    |    |     | TTCTAAAAATATTCTTTTTAAAGTAGAAAAATAGAGATATACATTGGAGAGTAAGATATAGAGCTATACT | 100 |

|         |                                                                   |     |     |     |     |     |     |     |     |     |                                                                                   |     |
|---------|-------------------------------------------------------------------|-----|-----|-----|-----|-----|-----|-----|-----|-----|-----------------------------------------------------------------------------------|-----|
|         | 110                                                               | 120 | 130 | 140 | 150 | 160 | 170 | 180 | 190 | 200 |                                                                                   |     |
|         | ----- ----- ----- ----- ----- ----- ----- ----- ----- ----- ----- |     |     |     |     |     |     |     |     |     |                                                                                   |     |
| Col-0   | ATTGGAGATGGTCTAAAAC                                               |     |     |     |     |     |     |     |     |     | CTCTCCGACTTATCAAAAGTGAAGCTATCTGATTCGATGGTCCCACAAAAGCTAGAACAAAACCTTATGGCATATGCTTAT | 199 |
| C24     | ATTGGAGATGGTCTAAAAC                                               |     |     |     |     |     |     |     |     |     | CTCTCCGACTTATCAAAAGTGAAGCTATCTGATTCGATGGTCCCACAAAAGCTAGAACAAAACCTTATGGCATATGCTTAT | 199 |
| Ca-0    | ATTGGAGATGGTCTAAAAC                                               |     |     |     |     |     |     |     |     |     | CTCTCCGACTTATCAAAAGTGAAGCTATCTGATTCGATGGTCCCACAAAAGCTAGAACAAAACCTTATGGCATATGCTTAT | 200 |
| Gie-0   | ATTGGAGATGGTCTAAAAC                                               |     |     |     |     |     |     |     |     |     | CTCTCCGACTTATCAAAAGTGAAGCTATCTGATTCGATGGTCCCACAAAAGCTAGAACAAAACCTTATGGCATATGCTTAT | 200 |
| Old-1   | ATTGGAGATGGTCTAAAAC                                               |     |     |     |     |     |     |     |     |     | CTCTCCGACTTATCAAAAGTGAAGCTATCTGATTCGATGGTCCCACAAAAGCTAGAACAAAACCTTATGGCATATGCTTAT | 199 |
| Pog-0   | ATTGGAGATGGTCTAAAAC                                               |     |     |     |     |     |     |     |     |     | CTCTCCGACTTATCAAAAGTGAAGCTATCTGATTCGATGGTCCCACAAAAGCTAGAACAAAACCTTATGGCATATGCTTAT | 169 |
| Ws-0    | ATTGGAGATGGTCTAAAAC                                               |     |     |     |     |     |     |     |     |     | CTCTCCGACTTATCAAAAGTGAAGCTATCTGATTCGATGGTCCCACAAAAGCTAGAACAAAACCTTATGGCATATGCTTAT | 200 |
| Da-1-12 | ATTGGAGATGGTCTAAAAC                                               |     |     |     |     |     |     |     |     |     | CTCTCCGACTTATCAAAAGTGAAGCTATCTGATTCGATGGTCCCACAAAAGCTAGAACAAAACCTTATGGCATATGCTTAT | 200 |
| Mz-0    | ATTGGAGATGGTCTAAAAC                                               |     |     |     |     |     |     |     |     |     | CTCTCCGACTTATCAAAAGTGAAGCTATCTGATTCGATGGTCCCACAAAAGCTAGAACAAAACCTTATGGCATATGCTTAT | 200 |
| Wa-1    | ATTGGAGATGGTCTAAAAC                                               |     |     |     |     |     |     |     |     |     | CTCTCCGACTTATCAAAAGTGAAGCTATCTGATTCGATGGTCCCACAAAAGCTAGAACAAAACCTTATGGCATATGCTTAT | 200 |
| La-0    | ATTGGAGATGGTCTAAAAC                                               |     |     |     |     |     |     |     |     |     | CTCTCCGACTTATCAAAAGTGAAGCTATCTGATTCGATGGTCCCACAAAAGCTAGAACAAAACCTTATGGCATATGCTTAT | 200 |

|         |                                                                                                      |     |     |     |     |     |     |     |     |     |     |
|---------|------------------------------------------------------------------------------------------------------|-----|-----|-----|-----|-----|-----|-----|-----|-----|-----|
|         | 210                                                                                                  | 220 | 230 | 240 | 250 | 260 | 270 | 280 | 290 | 300 |     |
|         | ----- ----- ----- ----- ----- ----- ----- ----- ----- ----- -----                                    |     |     |     |     |     |     |     |     |     |     |
| Col-0   | GCTATACCTTTTCAATCCTTTGATCTCTGTACGAAGGACCTCTCTGCTCCCTCCCAGGCAATATGGACAAGAAGCAAGAGACCTACCACATACACTCACT |     |     |     |     |     |     |     |     |     | 299 |
| C24     | GCTATACCTTTTCAATCCTTTGATCTCTGTACGAAGGACCTCTCTGCTCCCTCCCAGGCAATATGGACAAGAAGCAAGAGACCTACCACATACACTCACT |     |     |     |     |     |     |     |     |     | 299 |
| Ca-0    | GCTATACCTTTTCAATCCTTTGATCTCTGTACGAAGGACCTCTCTGCTCCCTCCCAGGCAATATGGACAAGAAGCAAGAGACCTACCACATACACTCACT |     |     |     |     |     |     |     |     |     | 300 |
| Gie-0   | GCTATACCTTTTCAATCCTTTGATCTCTGTACGAAGGACCTCTCTGCTCCCTCCCAGGCAATATGGACAAGAAGCAAGAGACCTACCACATACACTCACT |     |     |     |     |     |     |     |     |     | 300 |
| Old-1   | GCTATACCTTTTCAATCCTTTGATCTCTGTACGAAGGACCTCTCTGCTCCCTCCCAGGCAATATGGACAAGAAGCAAGAGACCTACCACATACACTCACT |     |     |     |     |     |     |     |     |     | 299 |
| Pog-0   | GCTATACCTTTTCAATCCTTTGATCTCTGTACGAAGGACCTCTCTGCTCCCTCCCAGGCAATATGGACAAGAAGCAAGAGACCTACCACATACACTCACT |     |     |     |     |     |     |     |     |     | 269 |
| Ws-0    | GCTATACCTTTTCAATCCTTTGATCTCTGTACGAAGGACCTCTCTGCTCCCTCCCAGGCAATATGGACAAGAAGCAAGAGACCTACCACATACACTCACT |     |     |     |     |     |     |     |     |     | 300 |
| Da-1-12 | GCTATACCTTTTCAATCCTTTGATCTCTGTACGAAGGACCTCTCTGCTCCCTCCCAGGCAATATGGACAAGAAGCAAGAGACCTACCACATACACTCACT |     |     |     |     |     |     |     |     |     | 300 |
| Mz-0    | GCTATACCTTTTCAATCCTTTGATCTCTGTACGAAGGACCTCTCTGCTCCCTCCCAGGCAATATGGACAAGAAGCAAGAGACCTACCACATACACTCACT |     |     |     |     |     |     |     |     |     | 300 |
| Wa-1    | GCTATACCTTTTCAATCCTTTGATCTCTGTACGAAGGACCTCTCTGCTCCCTCCCAGGCAATATGGACAAGAAGCAAGAGACCTACCACATACACTCACT |     |     |     |     |     |     |     |     |     | 300 |
| La-0    | GCTATACCTTTTCAATCCTTTGATCTCTGTACGAAGGACCTCTCTGCTCCCTCCCAGGCAATATGGACAAGAAGCAAGAGACCTACCACATACACTCACT |     |     |     |     |     |     |     |     |     | 300 |

|         |                                                                                                  |     |     |     |     |     |     |     |     |     |     |
|---------|--------------------------------------------------------------------------------------------------|-----|-----|-----|-----|-----|-----|-----|-----|-----|-----|
|         | 310                                                                                              | 320 | 330 | 340 | 350 | 360 | 370 | 380 | 390 | 400 |     |
|         | ----- ----- ----- ----- ----- ----- ----- ----- ----- ----- -----                                |     |     |     |     |     |     |     |     |     |     |
| Col-0   | CACTTATTCGATTTTTTTTCTGAAATGACATATGTACTTGTCAACTAGTGTGAAATTAATTTATCCAAAGTAATTGAATTTAGCTGAATTTGGGTT |     |     |     |     |     |     |     |     |     | 399 |
| C24     | CACTTATTCGATTTTTTTTCTGAAATGACATATGTACTTGTCAACTAGTGTGAAATTAATTTATCCAAAGTAATTGAATTTAGCTGAATTTGGGTT |     |     |     |     |     |     |     |     |     | 399 |
| Ca-0    | CACTTATTCGATTTTTTTTCTGAAATGACATATGTACTTGTCAACTAGTGTGAAATTAATTTATCCAAAGTAATTGAATTTAGCTGAATTTGGGTT |     |     |     |     |     |     |     |     |     | 400 |
| Gie-0   | CACTTATTCGATTTTTTTTCTGAAATGACATATGTACTTGTCAACTAGTGTGAAATTAATTTATCCAAAGTAATTGAATTTAGCTGAATTTGGGTT |     |     |     |     |     |     |     |     |     | 400 |
| Old-1   | CACTTATTCGATTTTTTTTCTGAAATGACATATGTACTTGTCAACTAGTGTGAAATTAATTTATCCAAAGTAATTGAATTTAGCTGAATTTGGGTT |     |     |     |     |     |     |     |     |     | 399 |
| Pog-0   | CACTTATTCGATTTTTTTTCTGAAATGACATATGTACTTGTCAACTAGTGTGAAATTAATTTATCCAAAGTAATTGAATTTAGCTGAATTTGGGTT |     |     |     |     |     |     |     |     |     | 369 |
| Ws-0    | CACTTATTCGATTTTTTTTCTGAAATGACATATGTACTTGTCAACTAGTGTGAAATTAATTTATCCAAAGTAATTGAATTTAGCTGAATTTGGGTT |     |     |     |     |     |     |     |     |     | 400 |
| Da-1-12 | CACTTATTCGATTTTTTTTCTGAAATGACATATGTACTTGTCAACTAGTGTGAAATTAATTTATCCAAAGTAATTGAATTTAGCTGAATTTGGGTT |     |     |     |     |     |     |     |     |     | 400 |
| Mz-0    | CACTTATTCGATTTTTTTTCTGAAATGACATATGTACTTGTCAACTAGTGTGAAATTAATTTATCCAAAGTAATTGAATTTAGCTGAATTTGGGTT |     |     |     |     |     |     |     |     |     | 400 |
| Wa-1    | CACTTATTCGATTTTTTTTCTGAAATGACATATGTACTTGTCAACTAGTGTGAAATTAATTTATCCAAAGTAATTGAATTTAGCTGAATTTGGGTT |     |     |     |     |     |     |     |     |     | 400 |
| La-0    | CACTTATTCGATTTTTTTTCTGAAATGACATATGTACTTGTCAACTAGTGTGAAATTAATTTATCCAAAGTAATTGAATTTAGCTGAATTTGGGTT |     |     |     |     |     |     |     |     |     | 400 |

|         |                                                                                                        |     |     |     |     |     |     |     |     |     |     |
|---------|--------------------------------------------------------------------------------------------------------|-----|-----|-----|-----|-----|-----|-----|-----|-----|-----|
|         | 410                                                                                                    | 420 | 430 | 440 | 450 | 460 | 470 | 480 | 490 | 500 |     |
|         | ----- ----- ----- ----- ----- ----- ----- ----- ----- ----- -----                                      |     |     |     |     |     |     |     |     |     |     |
| Col-0   | TATTTTAAATAAAATATTTATATACATTTTTGTAACACTTTTATAAAAATAAATCCTCAAAATGTAACCTGTTATAAAAAGAATGTCATTGGCATTAAATTA |     |     |     |     |     |     |     |     |     | 499 |
| C24     | TATTTTAAATAAAATATTTATATACATTTTTGTAACACTTTTATAAAAATAAATCCTCAAAATGTAACCTGTTATAAAAAGAATGTCATTGGCATTAAATTA |     |     |     |     |     |     |     |     |     | 498 |
| Ca-0    | TATTTTAAATAAAATATTTATATACATTTTTGTAACACTTTTATAAAAATAAATCCTCAAAATGTAACCTGTTATAAAAAGAATGTCATTGGCATTAAATTA |     |     |     |     |     |     |     |     |     | 500 |
| Gie-0   | TATTTTAAATAAAATATTTATATACATTTTTGTAACACTTTTATAAAAATAAATCCTCAAAATGTAACCTGTTATAAAAAGAATGTCATTGGCATTAAATTA |     |     |     |     |     |     |     |     |     | 489 |
| Old-1   | TATTTTAAATAAAATATTTATATACATTTTTGTAACACTTTTATAAAAATAAATCCTCAAAATGTAACCTGTTATAAAAAGAATGTCATTGGCATTAAATTA |     |     |     |     |     |     |     |     |     | 499 |
| Pog-0   | TATTTTAAATAAAATATTTATATACATTTTTGTAACACTTTTATAAAAATAAATCCTCAAAATGTAACCTGTTATAAAAAGAATGTCATTGGCATTAAATTA |     |     |     |     |     |     |     |     |     | 469 |
| Ws-0    | TATTTTAAATAAAATATTTATATACATTTTTGTAACACTTTTATAAAAATAAATCCTCAAAATGTAACCTGTTATAAAAAGAATGTCATTGGCATTAAATTA |     |     |     |     |     |     |     |     |     | 492 |
| Da-1-12 | TATTTTAAATAAAATATTTATATACATTTTTGTAACACTTTTATAAAAATAAATCCTCAAAATGTAACCTGTTATAAAAAGAATGTCATTGGCATTAAATTA |     |     |     |     |     |     |     |     |     | 500 |
| Mz-0    | TATTTTAAATAAAATATTTATATACATTTTTGTAACACTTTTATAAAAATAAATCCTCAAAATGTAACCTGTTATAAAAAGAATGTCATTGGCATTAAATTA |     |     |     |     |     |     |     |     |     | 500 |
| Wa-1    | TATTTTAAATAAAATATTTATATACATTTTTGTAACACTTTTATAAAAATAAATCCTCAAAATGTAACCTGTTATAAAAAGAATGTCATTGGCATTAAATTA |     |     |     |     |     |     |     |     |     | 500 |
| La-0    | TATTTTAAATAAAATATTTATATACATTTTTGTAACACTTTTATAAAAATAAATCCTCAAAATGTAACCTGTTATAAAAAGAATGTCATTGGCATTAAATTA |     |     |     |     |     |     |     |     |     | 500 |

Supplementary Figure S2  
(Figure continues on next page)

|         | 510                         | 520     | 530    | 540                       | 550    | 560        | 570    | 580                 | 590 | 600 |     |
|---------|-----------------------------|---------|--------|---------------------------|--------|------------|--------|---------------------|-----|-----|-----|
| Col-0   | TTATCAATTATTTAATATTCCTAATTA | CTAATTA | CAATTT | CGTTATCTAATGTATATCTCCATCA | ATTCTA | ATTACGAAAA | AAATGG | GAGAAATTTTAGGACATTA |     |     | 599 |
| C24     | TTATCAATTATTTAATATTCCTAATTA | CTAATTA | CAATTT | CGTTATCTAATGTATATCTCCATCA | ATTCTA | ATTACGAAAA | AAATGG | GAGAAATTTTAGGACATTA |     |     | 598 |
| Ca-0    | TTATCAATTATTTAATATTCCTAATTA | CTAATTA | CAATTT | CGTTATCTAATGTATATCTCCATCA | ATTCTA | ATTACGAAAA | AAATGG | GAGAAATTTTAGGACATTA |     |     | 600 |
| Gie-0   | TTATCAATTATTTAATATTCCTAATTA | CTAATTA | CAATTT | CGTTATCTAATGTATATCTCCATCA | ATTCTA | ATTACGAAAA | AAATGG | GAGAAATTTTAGGACATTA |     |     | 589 |
| Old-1   | TTATCAATTATTTAATATTCCTAATTA | CTAATTA | CAATTT | CGTTATCTAATGTATATCTCCATCA | ATTCTA | ATTACGAAAA | AAATGG | GAGAAATTTTAGGACATTA |     |     | 599 |
| Pog-0   | TTATCAATTATTTAATATTCCTAATTA | CTAATTA | CAATTT | CGTTATCTAATGTATATCTCCATCA | ATTCTA | ATTACGAAAA | AAATGG | GAGAAATTTTAGGACATTA |     |     | 569 |
| Ws-0    | TTATCAATTATTTAATATTCCTAATTA | CTAATTA | CAATTT | CGTTATCTAATGTATATCTCCATCA | ATTCTA | ATTACGAAAA | AAATGG | GAGAAATTTTAGGACATTA |     |     | 592 |
| Da-1-12 | TTATCAATTATTTAATATTCCTAATTA | CTAATTA | CAATTT | CGTTATCTAATGTATATCTCCATCA | ATTCTA | ATTACGAAAA | AAATGG | GAGAAATTTTAGGACATTA |     |     | 600 |
| Mz-0    | TTATCAATTATTTAATATTCCTAATTA | CTAATTA | CAATTT | CGTTATCTAATGTATATCTCCATCA | ATTCTA | ATTACGAAAA | AAATGG | GAGAAATTTTAGGACATTA |     |     | 600 |
| Wa-1    | TTATCAATTATTTAATATTCCTAATTA | CTAATTA | CAATTT | CGTTATCTAATGTATATCTCCATCA | ATTCTA | ATTACGAAAA | AAATGG | GAGAAATTTTAGGACATTA |     |     | 600 |
| La-0    | TTATCAATTATTTAATATTCCTAATTA | CTAATTA | CAATTT | CGTTATCTAATGTATATCTCCATCA | ATTCTA | ATTACGAAAA | AAATGG | GAGAAATTTTAGGACATTA |     |     | 600 |

|         | 610                         | 620     | 630     | 640      | 650     | 660     | 670     | 680      | 690     | 700        |         |     |
|---------|-----------------------------|---------|---------|----------|---------|---------|---------|----------|---------|------------|---------|-----|
| Col-0   | TTAATATTATACTTTATTTAAAAGATA | AAATATT | GTAAATG | ATTCAAGT | GAATAAA | ATTTTGA | ATATTTA | ACGGAAAC | ATTATTT | TAGAATATTT | TAGAATA | 699 |
| C24     | TTAATATTATACTTTATTTAAAAGATA | AAATATT | GTAAATG | ATTCAAGT | GAATAAA | ATTTTGA | ATATTTA | ACGGAAAC | ATTATTT | TAGAATATTT | TAGAATA | 698 |
| Ca-0    | TTAATATTATACTTTATTTAAAAGATA | AAATATT | GTAAATG | ATTCAAGT | GAATAAA | ATTTTGA | ATATTTA | ACGGAAAC | ATTATTT | TAGAATATTT | TAGAATA | 700 |
| Gie-0   | TTAATATTATACTTTATTTAAAAGATA | AAATATT | GTAAATG | ATTCAAGT | GAATAAA | ATTTTGA | ATATTTA | ACGGAAAC | ATTATTT | TAGAATATTT | TAGAATA | 689 |
| Old-1   | TTAATATTATACTTTATTTAAAAGATA | AAATATT | GTAAATG | ATTCAAGT | GAATAAA | ATTTTGA | ATATTTA | ACGGAAAC | ATTATTT | TAGAATATTT | TAGAATA | 699 |
| Pog-0   | TTAATATTATACTTTATTTAAAAGATA | AAATATT | GTAAATG | ATTCAAGT | GAATAAA | ATTTTGA | ATATTTA | ACGGAAAC | ATTATTT | TAGAATATTT | TAGAATA | 669 |
| Ws-0    | TTAATATTATACTTTATTTAAAAGATA | AAATATT | GTAAATG | ATTCAAGT | GAATAAA | ATTTTGA | ATATTTA | ACGGAAAC | ATTATTT | TAGAATATTT | TAGAATA | 692 |
| Da-1-12 | TTAATATTATACTTTATTTAAAAGATA | AAATATT | GTAAATG | ATTCAAGT | GAATAAA | ATTTTGA | ATATTTA | ACGGAAAC | ATTATTT | TAGAATATTT | TAGAATA | 700 |
| Mz-0    | TTAATATTATACTTTATTTAAAAGATA | AAATATT | GTAAATG | ATTCAAGT | GAATAAA | ATTTTGA | ATATTTA | ACGGAAAC | ATTATTT | TAGAATATTT | TAGAATA | 700 |
| Wa-1    | TTAATATTATACTTTATTTAAAAGATA | AAATATT | GTAAATG | ATTCAAGT | GAATAAA | ATTTTGA | ATATTTA | ACGGAAAC | ATTATTT | TAGAATATTT | TAGAATA | 700 |
| La-0    | TTAATATTATACTTTATTTAAAAGATA | AAATATT | GTAAATG | ATTCAAGT | GAATAAA | ATTTTGA | ATATTTA | ACGGAAAC | ATTATTT | TAGAATATTT | TAGAATA | 700 |

|         | 710                  | 720      | 730     | 740     | 750    | 760     | 770      | 780      | 790    | 800        |         |     |
|---------|----------------------|----------|---------|---------|--------|---------|----------|----------|--------|------------|---------|-----|
| Col-0   | TGTGAAATCTATAAAAATTA | AAATAACT | ATTTGAA | AGAAAAC | TTTTAA | AATGATT | GAATTATA | AAATCTTT | ATAAAA | AGTATTATTT | AAAAACA | 799 |
| C24     | TGTGAAATCTATAAAAATTA | AAATAACT | ATTTGAA | AGAAAAC | TTTTAA | AATGATT | GAATTATA | AAATCTTT | ATAAAA | AGTATTATTT | AAAAACA | 798 |
| Ca-0    | TGTGAAATCTATAAAAATTA | AAATAACT | ATTTGAA | AGAAAAC | TTTTAA | AATGATT | GAATTATA | AAATCTTT | ATAAAA | AGTATTATTT | AAAAACA | 800 |
| Gie-0   | TGTGAAATCTATAAAAATTA | AAATAACT | ATTTGAA | AGAAAAC | TTTTAA | AATGATT | GAATTATA | AAATCTTT | ATAAAA | AGTATTATTT | AAAAACA | 789 |
| Old-1   | TGTGAAATCTATAAAAATTA | AAATAACT | ATTTGAA | AGAAAAC | TTTTAA | AATGATT | GAATTATA | AAATCTTT | ATAAAA | AGTATTATTT | AAAAACA | 799 |
| Pog-0   | TGTGAAATCTATAAAAATTA | AAATAACT | ATTTGAA | AGAAAAC | TTTTAA | -----   | -----    | -----    | -----  | -----      | -----   | 715 |
| Ws-0    | TGTGAAATCTATAAAAATTA | AAATAACT | ATTTGAA | AGAAAAC | TTTTAA | AATGATT | GAATTATA | AAATCTTT | ATAAAA | AGTATTATTT | AAAAACA | 792 |
| Da-1-12 | TGTGAAATCTATAAAAATTA | AAATAACT | ATTTGAA | AGAAAAC | TTTTAA | AATGATT | GAATTATA | AAATCTTT | ATAAAA | AGTATTATTT | AAAAACA | 800 |
| Mz-0    | TGTGAAATCTATAAAAATTA | AAATAACT | ATTTGAA | AGAAAAC | TTTTAA | AATGATT | GAATTATA | AAATCTTT | ATAAAA | AGTATTATTT | AAAAACA | 800 |
| Wa-1    | TGTGAAATCTATAAAAATTA | AAATAACT | ATTTGAA | AGAAAAC | TTTTAA | AATGATT | GAATTATA | AAATCTTT | ATAAAA | AGTATTATTT | AAAAACA | 800 |
| La-0    | TGTGAAATCTATAAAAATTA | AAATAACT | ATTTGAA | AGAAAAC | TTTTAA | AATGATT | GAATTATA | AAATCTTT | ATAAAA | AGTATTATTT | AAAAACA | 800 |

|         | 810               | 820     | 830     | 840    | 850     | 860    | 870     | 880     | 890     | 900     |        |     |
|---------|-------------------|---------|---------|--------|---------|--------|---------|---------|---------|---------|--------|-----|
| Col-0   | AAAATAATGTTAATTTT | ACTGAAC | GAGATCA | AATGGT | ATGTCAG | GTGAAA | ATTTATA | AATATAT | GAAATTT | TATAACA | ATTAAG | 899 |
| C24     | AAAATAATGTTAATTTT | ACTGAAC | GAGATCA | AATGGT | ATGTCAG | GTGAAA | ATTTATA | AATATAT | GAAATTT | TATAACA | ATTAAG | 898 |
| Ca-0    | AAAATAATGTTAATTTT | ACTGAAC | GAGATCA | AATGGT | ATGTCAG | GTGAAA | ATTTATA | AATATAT | GAAATTT | TATAACA | ATTAAG | 900 |
| Gie-0   | AAAATAATGTTAATTTT | ACTGAAC | GAGATCA | AATGGT | ATGTCAG | GTGAAA | ATTTATA | AATATAT | GAAATTT | TATAACA | ATTAAG | 889 |
| Old-1   | AAAATAATGTTAATTTT | ACTGAAC | GAGATCA | AATGGT | ATGTCAG | GTGAAA | ATTTATA | AATATAT | GAAATTT | TATAACA | ATTAAG | 843 |
| Pog-0   | -----             | -----   | -----   | -----  | -----   | -----  | -----   | -----   | -----   | -----   | -----  | 715 |
| Ws-0    | AAAATAAWGTTAATTTT | WCTGAAC | GAGATCA | AATGGT | ATGTCAG | GTGAAA | ATTTATA | AATATAT | GAAATTT | TATAACA | ATTAAG | 892 |
| Da-1-12 | AAAATAATGTTAATTTT | ACTGAAC | GAGATCA | AATGGT | ATGTCAG | GTGAAA | ATTTATA | AATATAT | GAAATTT | TATAACA | ATTAAG | 900 |
| Mz-0    | AAAATAATGTTAATTTT | ACTGAAC | GAGATCA | AATGGT | ATGTCAG | GTGAAA | ATTTATA | AATATAT | GAAATTT | TATAACA | ATTAAG | 900 |
| Wa-1    | AAAATAATGTTAATTTT | ACTGAAC | GAGATCA | AATGGT | ATGTCAG | GTGAAA | ATTTATA | AATATAT | GAAATTT | TATAACA | ATTAAG | 900 |
| La-0    | AAAATAATGTTAATTTT | ACTGAAC | GAGATCA | AATGGT | ATGTCAG | GTGAAA | ATTTATA | AATATAT | GAAATTT | TATAACA | ATTAAG | 900 |

|         | 910               | 920     | 930    | 940        | 950      | 960     | 970    | 980    | 990    | 1000   |         |      |
|---------|-------------------|---------|--------|------------|----------|---------|--------|--------|--------|--------|---------|------|
| Col-0   | AAACTTTTAAATGATTT | GAAATTA | AAATTT | AAATATTA   | TAAAAAAA | TAACAAA | AATGTT | TAATTT | CACTTA | ACGAGG | TAGATGG | 998  |
| C24     | AAACTTTTAAATGATTT | GAAATTA | AAATTT | AAATATTA   | TAAAAAAA | TAACAAA | AATGTT | TAATTT | CACTTA | ACGAGG | TAGATGG | 997  |
| Ca-0    | AAACTTTTAAATGATTT | GAAATTA | AAATTT | AAATATTA   | TAAAAAAA | TAACAAA | AATGTT | TAATTT | CACTTA | ACGAGG | TAGATGG | 1000 |
| Gie-0   | AAACTTTTAAATGATTT | GAAATTA | AAATTT | AAATATTA   | TAAAAAAA | TAACAAA | AATGTT | TAATTT | CACTTA | ACGAGG | TAGATGG | 988  |
| Old-1   | -----             | TTGAAT  | TATAAA | TTAAATATTA | TAAAAAAA | TAACAAA | AATGTT | TAATTT | CACTTA | ACGAGG | TAGATGG | 926  |
| Pog-0   | -----             | -----   | -----  | -----      | -----    | -----   | -----  | -----  | -----  | -----  | -----   | 775  |
| Ws-0    | AAACTTTTAAATGATTT | GAAATTA | AAATTT | AAATATTA   | TAAAAAAA | TAACAAA | AATGTT | TAATTT | CACTTA | ACGAGG | TAGATGG | 991  |
| Da-1-12 | AAACTTTTAAATGATTT | GAAATTA | AAATTT | AAATATTA   | TAAAAAAA | TAACAAA | AATGTT | TAATTT | CACTTA | ACGAGG | TAGATGG | 1000 |
| Mz-0    | AAACTTTTAAATGATTT | GAAATTA | AAATTT | AAATATTA   | TAAAAAAA | TAACAAA | AATGTT | TAATTT | CACTTA | ACGAGG | TAGATGG | 1000 |
| Wa-1    | AAACTTTTAAATGATTT | GAAATTA | AAATTT | AAATATTA   | TAAAAAAA | TAACAAA | AATGTT | TAATTT | CACTTA | ACGAGG | TAGATGG | 1000 |
| La-0    | AAACTTTTAAATGATTT | GAAATTA | AAATTT | AAATATTA   | TAAAAAAA | TAACAAA | AATGTT | TAATTT | CACTTA | ACGAGG | TAGATGG | 999  |

|         | 1010                                                         | 1020                                    | 1030 | 1040 | 1050 | 1060 | 1070 | 1080 | 1090 | 1100 |  |
|---------|--------------------------------------------------------------|-----------------------------------------|------|------|------|------|------|------|------|------|--|
| Col-0   | TTTGAGTCGATAGTAATATGAGACGATAAACCACAGGTGAAATCCATTAGATATGTTTAA | TTTCACTTAACGGGGTTAGATGGTAGGACGGGTTGGGTC | 1098 |      |      |      |      |      |      |      |  |
| C24     | TTTGAGTCGATAGTAATATGAGACGATAAACCACAGGTGAAATCCATTAGATATGTTTAA | TTTCACTTAACGGGGTTAGATGGTAGGACGGGTTGGGTC | 1097 |      |      |      |      |      |      |      |  |
| Ca-0    | TTTGAGTCGATAGTAATATGAGACGATAAACCACAGGTGAAATCCATTAGATATGTTTAA | TTTCACTTAACGGGGTTAGATGGTAGGACGGGTTGGGTC | 1100 |      |      |      |      |      |      |      |  |
| Gie-0   | TTTGAGTCGATAGTAATATGAGACGATAAACCACAGGTGAAATCCATTAGATATGTTTAA | TTTCACTTAACGGGGTTAGATGGTAGGACGGGTTGGGTC | 1088 |      |      |      |      |      |      |      |  |
| Old-1   | TTTGAGTCGATAGTAATATGAGACGATAAACCACAGGTGAAATCCATTAGATATGTTTAA | TTTCACTTAACGGGGTTAGATGGTAGGACGGGTTGGGTC | 1026 |      |      |      |      |      |      |      |  |
| Pog-0   | TTTGAGTCGATAGTAATATGAGACGATAAACCACAGGTGAAATCCATTAGATATGTTTAA | TTTCACTTAACGGGGTTAGATGGTAGGACGGGTTGGGTC | 875  |      |      |      |      |      |      |      |  |
| Ws-0    | TTTGAGTCGATAGTAATATGAGACGATAAACCACAGGTGAAATCCATTAGATATGTTTAA | TTTCACTTAACGGGGTTAGATGGTAGGACGGGTTGGGTC | 1091 |      |      |      |      |      |      |      |  |
| Da-1-12 | TTTGAGTCGATAGTAATATGAGACGATAAACCACAGGTGAAATCCATTAGATATGTTTAA | TTTCACTTAACGGGGTTAGATGGTAGGACGGGTTGGGTC | 1100 |      |      |      |      |      |      |      |  |
| Mz-0    | TTTGAGTCGATAGTAATATGAGACGATAAACCACAGGTGAAATCCATTAGATATGTTTAA | TTTCACTTAACGGGGTTAGATGGTAGGACGGGTTGGGTC | 1100 |      |      |      |      |      |      |      |  |
| Wa-1    | TTTGAGTCGATAGTAATATGAGACGATAAACCACAGGTGAAATCCATTAGATATGTTTAA | TTTCACTTAACGGGGTTAGATGGTAGGACGGGTTGGGTC | 1100 |      |      |      |      |      |      |      |  |
| La-0    | TTTGAGTCGATAGTAATATGAGACGATAAACCACAGGTGAAATCCATTAGATATGTTTAA | TTTCACTTAACGGGGTTAGATGGTAGGACGGGTTGGGTC | 1099 |      |      |      |      |      |      |      |  |

|         | 1110                                                                          | 1120                   | 1130 | 1140 | 1150 | 1160 | 1170 | 1180 | 1190 | 1200 |  |
|---------|-------------------------------------------------------------------------------|------------------------|------|------|------|------|------|------|------|------|--|
| Col-0   | GATAGTAAAACGAGACAGTATACCACGAGTGATATACATTAGATATTTTAAATTTTACTGAACGGGATTAATGGTAA | GACGGATTGGATCGATAGTAAT | 1198 |      |      |      |      |      |      |      |  |
| C24     | GATAGTAAAACGAGACAGTATACCACGAGTGATATACATTAGATATTTTAAATTTTACTGAACGGGATTAATGGTAA | GACGGATTGGATCGATAGTAAT | 1197 |      |      |      |      |      |      |      |  |
| Ca-0    | GATAGTAAAACGAGACAGTATACCACGAGTGATATACATTAGATATTTTAAATTTTACTGAACGGGATTAATGGTAA | GACGGATTGGATCGATAGTAAT | 1200 |      |      |      |      |      |      |      |  |
| Gie-0   | GATAGTAAAACGAGACAGTATACCACGAGTGATATACATTAGATATTTTAAATTTTACTGAACGGGATTAATGGTAA | GACGGATTGGATCGATAGTAAT | 1188 |      |      |      |      |      |      |      |  |
| Old-1   | GATAGTAAAACGAGACAGTATACCACGAGTGATATACATTAGATATTTTAAATTTTACTGAACGGGATTAATGGTAA | GACGGATTGGATCGATAGTAAT | 1126 |      |      |      |      |      |      |      |  |
| Pog-0   | GATAGTAAAACGAGACAGTATACCACGAGTGATATACATTAGATATTTTAAATTTTACTGAACGGGATTAATGGTAA | GACGGATTGGATCGATAGTAAT | 975  |      |      |      |      |      |      |      |  |
| Ws-0    | GATAGTAAAACGAGACAGTATACCACGAGTGATATACATTAGATATTTTAAATTTTACTGAACGGGATTAATGGTAA | GACGGATTGGATCGATAGTAAT | 1191 |      |      |      |      |      |      |      |  |
| Da-1-12 | GATAGTAAAACGAGACAGTATACCACGAGTGATATACATTAGATATTTTAAATTTTACTGAACGGGATTAATGGTAA | GACGGATTGGATCGATAGTAAT | 1200 |      |      |      |      |      |      |      |  |
| Mz-0    | GATAGTAAAACGAGACAGTATACCACGAGTGATATACATTAGATATTTTAAATTTTACTGAACGGGATTAATGGTAA | GACGGATTGGATCGATAGTAAT | 1200 |      |      |      |      |      |      |      |  |
| Wa-1    | GATAGTAAAACGAGACAGTATACCACGAGTGATATACATTAGATATTTTAAATTTTACTGAACGGGATTAATGGTAA | GACGGATTGGATCGATAGTAAT | 1200 |      |      |      |      |      |      |      |  |
| La-0    | GATAGTAAAACGAGACAGTATACCACGAGTGATATACATTAGATATTTTAAATTTTACTGAACGGGATTAATGGTAA | GACGGATTGGATCGATAGTAAT | 1199 |      |      |      |      |      |      |      |  |

|         | 1210                                                                                              | 1220 | 1230 | 1240 | 1250 | 1260 | 1270 | 1280 | 1290 | 1300 |  |
|---------|---------------------------------------------------------------------------------------------------|------|------|------|------|------|------|------|------|------|--|
| Col-0   | ACGAGACGGTATACCACATGTGAAATCCAAGATATAACAATCAAATACAATATTTTATCTTAAATAGTAAACAGAACAACAATATTAACAAAATAAA | 1298 |      |      |      |      |      |      |      |      |  |
| C24     | ACGAGACGGTATACCACATGTGAAATCCAAGATATAACAATCAAATACAATATTTTATCTTAAATAGTAAACAGAACAACAATATTAACAAAATAAA | 1297 |      |      |      |      |      |      |      |      |  |
| Ca-0    | ACGAGACGGTATACCACATGTGAAATCCAAGATATAACAATCAAATACAATATTTTATCTTAAATAGTAAACAGAACAACAATATTAACAAAATAAA | 1300 |      |      |      |      |      |      |      |      |  |
| Gie-0   | ACGAGACGGTATACCACATGTGAAATCCAAGATATAACAATCAAATACAATATTTTATCTTAAATAGTAAACAGAACAACAATATTAACAAAATAAA | 1288 |      |      |      |      |      |      |      |      |  |
| Old-1   | ACGAGACGGTATACCACATGTGAAATCCAAGATATAACAATCAAATACAATATTTTATCTTAAATAGTAAACAGAACAACAATATTAACAAAATAAA | 1226 |      |      |      |      |      |      |      |      |  |
| Pog-0   | ACGAGACGGTATACCACATGTGAAATCCAAGATATAACAATCAAATACAATATTTTATCTTAAATAGTAAACAGAACAACAATATTAACAAAATAAA | 1075 |      |      |      |      |      |      |      |      |  |
| Ws-0    | ACGAGACGGTATACCACATGTGAAATCCAAGATATAACAATCAAATACAATATTTTATCTTAAATAGTAAACAGAACAACAATATTAACAAAATAAA | 1291 |      |      |      |      |      |      |      |      |  |
| Da-1-12 | ACGAGACGGTATACCACATGTGAAATCCAAGATATAACAATCAAATACAATATTTTATCTTAAATAGTAAACAGAACAACAATATTAACAAAATAAA | 1300 |      |      |      |      |      |      |      |      |  |
| Mz-0    | ACGAGACGGTATACCACATGTGAAATCCAAGATATAACAATCAAATACAATATTTTATCTTAAATAGTAAACAGAACAACAATATTAACAAAATAAA | 1300 |      |      |      |      |      |      |      |      |  |
| Wa-1    | ACGAGACGGTATACCACATGTGAAATCCAAGATATAACAATCAAATACAATATTTTATCTTAAATAGTAAACAGAACAACAATATTAACAAAATAAA | 1300 |      |      |      |      |      |      |      |      |  |
| La-0    | ACGAGACGGTATACCACATGTGAAATCCAAGATATAACAATCAAATACAATATTTTATCTTAAATAGTAAACAGAACAACAATATTAACAAAATAAA | 1299 |      |      |      |      |      |      |      |      |  |

|         | 1310                                                                                                  | 1320 | 1330 | 1340 | 1350 | 1360 | 1370 | 1380 | 1390 | 1400 |  |
|---------|-------------------------------------------------------------------------------------------------------|------|------|------|------|------|------|------|------|------|--|
| Col-0   | TATAATTTAAATTTAAATTTATTTAGTTATAATCTAGATCTAGATTTTAACTTAATGAATTGTATGTTATTGTTCCCATACTTTTAAACAGTAAAAATCAA | 1398 |      |      |      |      |      |      |      |      |  |
| C24     | TATAATTTAAATTTAAATTTATTTAGTTATAATCTAGATCTAGATTTTAACTTAATGAATTGTATGTTATTGTTCCCATACTTTTAAACAGTAAAAATCAA | 1397 |      |      |      |      |      |      |      |      |  |
| Ca-0    | TATAATTTAAATTTAAATTTATTTAGTTATAATCTAGATCTAGATTTTAACTTAATGAATTGTATGTTATTGTTCCCATACTTTTAAACAGTAAAAATCAA | 1400 |      |      |      |      |      |      |      |      |  |
| Gie-0   | TATAATTTAAATTTAAATTTATTTAGTTATAATCTAGATCTAGATTTTAACTTAATGAATTGTATGTTATTGTTCCCATACTTTTAAACAGTAAAAATCAA | 1388 |      |      |      |      |      |      |      |      |  |
| Old-1   | TATAATTTAAATTTAAATTTATTTAGTTATAATCTAGATCTAGATTTTAACTTAATGAATTGTATGTTATTGTTCCCATACTTTTAAACAGTAAAAATCAA | 1321 |      |      |      |      |      |      |      |      |  |
| Pog-0   | TATAATTTAAATTTAAATTTATTTAGTTATAATCTAGATCTAGATTTTAACTTAATGAATTGTATGTTATTGTTCCCATACTTTTAAACAGTAAAAATCAA | 1170 |      |      |      |      |      |      |      |      |  |
| Ws-0    | TATAATTTAAATTTAAATTTATTTAGTTATAATCTAGATCTAGATTTTAACTTAATGAATTGTATGTTATTGTTCCCATACTTTTAAACAGTAAAAATCAA | 1391 |      |      |      |      |      |      |      |      |  |
| Da-1-12 | TATAATTTAAATTTAAATTTATTTAGTTATAATCTAGATCTAGATTTTAACTTAATGAATTGTATGTTATTGTTCCCATACTTTTAAACAGTAAAAATCAA | 1400 |      |      |      |      |      |      |      |      |  |
| Mz-0    | TATAATTTAAATTTAAATTTATTTAGTTATAATCTAGATCTAGATTTTAACTTAATGAATTGTATGTTATTGTTCCCATACTTTTAAACAGTAAAAATCAA | 1307 |      |      |      |      |      |      |      |      |  |
| Wa-1    | TATAATTTAAATTTAAATTTATTTAGTTATAATCTAGATCTAGATTTTAACTTAATGAATTGTATGTTATTGTTCCCATACTTTTAAACAGTAAAAATCAA | 1400 |      |      |      |      |      |      |      |      |  |
| La-0    | TATAATTTAAATTTAAATTTATTTAGTTATAATCTAGATCTAGATTTTAACTTAATGAATTGTATGTTATTGTTCCCATACTTTTAAACAGTAAAAATCAA | 1399 |      |      |      |      |      |      |      |      |  |

|         | 1410                                         | 1420                                                   | 1430 | 1440 | 1450 | 1460 | 1470 | 1480 | 1490 | 1500 |  |
|---------|----------------------------------------------|--------------------------------------------------------|------|------|------|------|------|------|------|------|--|
| Col-0   | ACATAGTAATTGTATACTAATATATATATATATAAGAATTGTA  | CATTTACAAAATACAAAACATTAATTTATATTTTATTATTAACAAATTAATTTT | 1498 |      |      |      |      |      |      |      |  |
| C24     | ACATAGTAATTGTATACTAATATATATATATATAAGAATTGTA  | CATTTACAAAATACAAAACATTAATTTATATTTTATTATTAACAAATTAATTTT | 1497 |      |      |      |      |      |      |      |  |
| Ca-0    | ACATAGTAATTGTATACTAATATATATATATATAAGAATTGTA  | CATTTACAAAATACAAAACATTAATTTATATTTTATTATTAACAAATTAATTTT | 1500 |      |      |      |      |      |      |      |  |
| Gie-0   | ACATAGTAATTGTATACTAATATATATATATATAAGAATTGTA  | CATTTACAAAATACAAAACATTAATTTATATTTTATTATTAACAAATTAATTTT | 1487 |      |      |      |      |      |      |      |  |
| Old-1   | -----TATATAAGAATTGTA                         | CATTTACAAAATACAAAACATTAATTTATATTTTATTATTAACAAATTAATTTT | 1391 |      |      |      |      |      |      |      |  |
| Pog-0   | -----T-----GTA                               | CATTTACAAAATACAAAACATTAATTTATATTTTATTATTAACAAATTAATTTT | 1229 |      |      |      |      |      |      |      |  |
| Ws-0    | ACARTARTAAATGTATACTAATATATATATATA--AGAATTGTA | CATTTACAAAATACAAAACATTAATTTATATTTTATTATTAACAAATTAATTTT | 1489 |      |      |      |      |      |      |      |  |
| Da-1-12 | ACATAGTAATTGTATACTAATATATATATATATAAGAATTGTA  | CATTTACAAAATACAAAACATTAATTTATATTTTATTATTAACAAATTAATTTT | 1500 |      |      |      |      |      |      |      |  |
| Mz-0    | -----                                        | CATTTACAAAATACAAAACATTAATTTATATTTTATTATTAACAAATTAATTTT | 1364 |      |      |      |      |      |      |      |  |
| Wa-1    | ACATAGTAATTGTATACTAATATATATATATATAAGAATTGTA  | CATTTACAAAATACAAAACATTAATTTATATTTTATTATTAACAAATTAATTTT | 1500 |      |      |      |      |      |      |      |  |
| La-0    | ACATAGTAATTGTATACTAATATATATATATATAAGAATTGTA  | CATTTACAAAATACAAAACATTAATTTATATTTTATTATTAACAAATTAATTTT | 1499 |      |      |      |      |      |      |      |  |

Supplementary Figure S2  
(Continued)

|         | 1510  | 1520         | 1530       | 1540          | 1550    | 1560                                                | 1570 | 1580 | 1590 | 1600 |  |
|---------|-------|--------------|------------|---------------|---------|-----------------------------------------------------|------|------|------|------|--|
| Col-0   | TGTTT | AAAAAATAGTTC | TACGGTTTAC | ACGGGTTAAAAAT | CTAGTTG | AATTCGATAAAATTTAAGCAAGCTCGTTTTTTTATGTTACCATTAGACCCA | 1598 |      |      |      |  |
| C24     | TGTTT | AAAAAATAGTTC | TACGGTTTAC | ACGGGTTAAAAAT | CTAGTTG | AATTCGATAAAATTTAAGCAAGCTCGTTTTTTTATGTTACCATTAGACCCA | 1597 |      |      |      |  |
| Ca-0    | TGTTT | AAAAAATAGTTC | TACGGTTTAC | ACGGGTTAAAAAT | CTAGTTA | AATTCGATAAAATTTAAGCAAGCTCGTTTTTTTATGTTACCATTAGACCCA | 1600 |      |      |      |  |
| Gie-0   | TGTTT | AAAAAATAGTTC | TACGGTTTAC | ACGGGTTAAAAAT | CTAGTTG | AATTCGATAAAATTTAAGCAAGCTCGTTTTTTTATGTTACCATTAGACCCA | 1587 |      |      |      |  |
| Old-1   | TGTTT | AAAAAATAGTTC | TACGGTTTAC | ACGGGTTAAAAAT | CTAGTTG | AATTCGATAAAATTTAAGCAAGCTCGTTTTTTTATGTTACCATTAGACCCA | 1491 |      |      |      |  |
| Pog-0   | TGTTT | AAAAAATAGTTC | TACGGTTTAC | ACGGGTTAAAAAT | CTAGTTG | AATTCGATAAAATTTAAGCAAGCTCGTTTTTTTATGTTACCATTAGACCCA | 1329 |      |      |      |  |
| Ws-0    | TGTTT | AAAAAATAGTTC | TACGGTTTAC | ACGGGTTAAAAAT | CTAGTTG | AATTCGATAAAATTTAAGCAAGCTCGTTTTTTTATGTTACCATTAGACCCA | 1589 |      |      |      |  |
| Da-1-12 | TGTTT | AAAAAATAGTTC | TACGGTTTAC | ACGGGTTAAAAAT | CTAGTTG | AATTCGATAAAATTTAAGCAAGCTCGTTTTTTTATGTTACCATTAGACCCA | 1600 |      |      |      |  |
| Mz-0    | TGTTT | AAAAAATAGTTC | TACGGTTTAC | ACGGGTTAAAAAT | CTAGTTG | AATTCGATAAAATTTAAGCAAGCTCGTTTTTTTATGTTACCATTAGACCCA | 1464 |      |      |      |  |
| Wa-1    | TGTTT | AAAAAATAGTTC | TACGGTTTAC | ACGGGTTAAAAAT | CTAGTTG | AATTCGATAAAATTTAAGCAAGCTCGTTTTTTTATGTTACCATTAGACCCA | 1600 |      |      |      |  |
| La-0    | TGTTT | AAAAAATAGTTC | TACGGTTTAC | ACGGGTTAAAAAT | CTAGTTG | AATTCGATAAAATTTAAGCAAGCTCGTTTTTTTATGTTACCATTAGACCCA | 1599 |      |      |      |  |

|         | 1610                                                                                              | 1620 | 1630 | 1640 | 1650 | 1660 | 1670 | 1680 | 1690 | 1700 |  |
|---------|---------------------------------------------------------------------------------------------------|------|------|------|------|------|------|------|------|------|--|
| Col-0   | TAATTATTTTAAATGCGATCAGGTTAGTAATATAAATTTGATTATCATTGATTTACTATATACCTTATGGATACACATGCGTTATTCGTTTTGTAAA | 1698 |      |      |      |      |      |      |      |      |  |
| C24     | TAATTATTTTAAATGCGATCAGGTTAGTAATATAAATTTGATTATCATTGATTTACTATATACCTTATGGATACACATGCGTTATTCGTTTTGTAAA | 1697 |      |      |      |      |      |      |      |      |  |
| Ca-0    | TAATTATTTTAAATGCGATCAGGTTAGTAATATAAATTTGATTATCATTGATTTACTATATACCTTATGGATACACATGCGTTATTCGTTTTGTAAA | 1700 |      |      |      |      |      |      |      |      |  |
| Gie-0   | TAATTATTTTAAATGCGATCAGGTTAGTAATATAAATTTGATTATCATTGATTTACTATATACCTTATGGATACACATGCGTTATTCGTTTTGTAAA | 1687 |      |      |      |      |      |      |      |      |  |
| Old-1   | TAATTATTTTAAATGCGATCAGGTTAGTAATATAAATTTGATTATCATTGATTTACTATATACCTTATGGATACACATGCGTTATTCGTTTTGTAAA | 1591 |      |      |      |      |      |      |      |      |  |
| Pog-0   | TAATTATTTTAAATGCGATCAGGTTAGTAATATAAATTTGATTATCATTGATTTACTATATACCTTATGGATACACATGCGTTATTCGTTTTGTAAA | 1429 |      |      |      |      |      |      |      |      |  |
| Ws-0    | TAATTATTTTAAATGCGATCAGGTTAGTAATATAAATTTGATTATCATTGATTTACTATATACCTTATGGATACACATGCGTTATTCGTTTTGTAAA | 1689 |      |      |      |      |      |      |      |      |  |
| Da-1-12 | TAATTATTTTAAATGCGATCAGGTTAGTAATATAAATTTGATTATCATTGATTTACTATATACCTTATGGATACACATGCGTTATTCGTTTTGTAAA | 1700 |      |      |      |      |      |      |      |      |  |
| Mz-0    | TAATTATTTTAAATGCGATCAGGTTAGTAATATAAATTTGATTATCATTGATTTACTATATACCTTATGGATACACATGCGTTATTCGTTTTGTAAA | 1564 |      |      |      |      |      |      |      |      |  |
| Wa-1    | TAATTATTTTAAATGCGATCAGGTTAGTAATATAAATTTGATTATCATTGATTTACTATATACCTTATGGATACACATGCGTTATTCGTTTTGTAAA | 1700 |      |      |      |      |      |      |      |      |  |
| La-0    | TAATTATTTTAAATGCGATCAGGTTAGTAATATAAATTTGATTATCATTGATTTACTATATACCTTATGGATACACATGCGTTATTCGTTTTGTAAA | 1699 |      |      |      |      |      |      |      |      |  |

|         | 1710                                                 | 1720                        | 1730             | 1740 | 1750 | 1760 | 1770 | 1780 | 1790 | 1800 |  |
|---------|------------------------------------------------------|-----------------------------|------------------|------|------|------|------|------|------|------|--|
| Col-0   | TCTGTTGCACGTTATCACTTAGCACATTTTGATTGTGTACACTATATTTATG | TGTTTGTATATCAATTATTTTGAATTC | TTTTATACGTAAACTA | 1798 |      |      |      |      |      |      |  |
| C24     | TCTGTTGCACGTTATCACTTAGCACATTTTGATTGTGTACACTATATTTATG | TGTTTGTATATCAATTATTTTGAATTC | TTTTATACGTAAACTA | 1797 |      |      |      |      |      |      |  |
| Ca-0    | TCTGTTGCACGTTATCACTTAGCACATTTTGATTGTGTACACTATATTTATG | TGTTTGTATATCAATTATTTTGAATTC | TTTTATACGTAAACTA | 1800 |      |      |      |      |      |      |  |
| Gie-0   | TCTGTTGCACGTTATCACTTAGCACATTTTGATTGTGTACACTATATTTATG | TGTTTGTATATCAATTATTTTGAATTC | TTTTATACGTAAACTA | 1787 |      |      |      |      |      |      |  |
| Old-1   | TCTGTTGCACGTTATCACTTAGCACATTTTGATTGTGTACACTATATTTATG | TGTTTGTATATCAATTATTTTGAATTC | TTTTATACGTAAACTA | 1691 |      |      |      |      |      |      |  |
| Pog-0   | TCTGTTGCACGTTATCACTTAGCACATTTTGATTGTGTACACTATATTTATG | TGTTTGTATATCAATTATTTTGAATTC | TTTTATACGTAAACTA | 1529 |      |      |      |      |      |      |  |
| Ws-0    | TCTGTTGCACGTTATCACTTAGCACATTTTGATTGTGTACACTATATTTATG | TGTTTGTATATCAATTATTTTGAATTC | TTTTATACGTAAACTA | 1789 |      |      |      |      |      |      |  |
| Da-1-12 | TCTGTTGCACGTTATCACTTAGCACATTTTGATTGTGTACACTATATTTATG | TGTTTGTATATCAATTATTTTGAATTC | TTTTATACGTAAACTA | 1800 |      |      |      |      |      |      |  |
| Mz-0    | TCTGTTGCACGTTATCACTTAGCACATTTTGATTGTGTACACTATATTTATG | TGTTTGTATATCAATTATTTTGAATTC | TTTTATACGTAAACTA | 1664 |      |      |      |      |      |      |  |
| Wa-1    | TCTGTTGCACGTTATCACTTAGCACATTTTGATTGTGTACACTATATTTATG | TGTTTGTATATCAATTATTTTGAATTC | TTTTATACGTAAACTA | 1800 |      |      |      |      |      |      |  |
| La-0    | TCTGTTGCACGTTATCACTTAGCACATTTTGATTGTGTACACTATATTTATG | TGTTTGTATATCAATTATTTTGAATTC | TTTTATACGTAAACTA | 1799 |      |      |      |      |      |      |  |

|         | 1810                                                                                                 | 1820 | 1830 | 1840 | 1850 | 1860 | 1870 | 1880 | 1890 | 1900 |  |
|---------|------------------------------------------------------------------------------------------------------|------|------|------|------|------|------|------|------|------|--|
| Col-0   | CACAACGTTTGGGTTATGTATACCTCTATATAAAGACACAACCTGCAACATGCACAATCCACTAAGTTCTATCTTAAAAAGGTCAACTTTAATTCACACA | 1898 |      |      |      |      |      |      |      |      |  |
| C24     | CACAACGTTTGGGTTATGTATACCTCTATATAAAGACACAACCTGCAACATGCACAATCCACTAAGTTCTATCTTAAAAAGGTCAACTTTAATTCACACA | 1897 |      |      |      |      |      |      |      |      |  |
| Ca-0    | CACAACGTTTGGGTTATGTATACCTCTATATAAAGACACAACCTGCAACATGCACAATCCACTAAGTTCTATCTTAAAAAGGTCAACTTTAATTCACACA | 1900 |      |      |      |      |      |      |      |      |  |
| Gie-0   | CACAACGTTTGGGTTATGTATACCTCTATATAAAGACACAACCTGCAACATGCACAATCCACTAAGTTCTATCTTAAAAAGGTCAACTTTAATTCACACA | 1887 |      |      |      |      |      |      |      |      |  |
| Old-1   | CACAACGTTTGGGTTATGTATACCTCTATATAAAGACACAACCTGCAACATGCACAATCCACTAAGTTCTATCTTAAAAAGGTCAACTTTAATTCACACA | 1791 |      |      |      |      |      |      |      |      |  |
| Pog-0   | CACAACGTTTGGGTTATGTATACCTCTATATAAAGACACAACCTGCAACATGCACAATCCACTAAGTTCTATCTTAAAAAGGTCAACTTTAATTCACACA | 1629 |      |      |      |      |      |      |      |      |  |
| Ws-0    | CACAACGTTTGGGTTATGTATACCTCTATATAAAGACACAACCTGCAACATGCACAATCCACTAAGTTCTATCTTAAAAAGGTCAACTTTAATTCACACA | 1889 |      |      |      |      |      |      |      |      |  |
| Da-1-12 | CACAACGTTTGGGTTATGTATACCTCTATATAAAGACACAACCTGCAACATGCACAATCCACTAAGTTCTATCTTAAAAAGGTCAACTTTAATTCACACA | 1900 |      |      |      |      |      |      |      |      |  |
| Mz-0    | CACAACGTTTGGGTTATGTATACCTCTATATAAAGACACAACCTGCAACATGCACAATCCACTAAGTTCTATCTTAAAAAGGTCAACTTTAATTCACACA | 1764 |      |      |      |      |      |      |      |      |  |
| Wa-1    | CACAACGTTTGGGTTATGTATACCTCTATATAAAGACACAACCTGCAACATGCACAATCCACTAAGTTCTATCTTAAAAAGGTCAACTTTAATTCACACA | 1900 |      |      |      |      |      |      |      |      |  |
| La-0    | CACAACGTTTGGGTTATGTATACCTCTATATAAAGACACAACCTGCAACATGCACAATCCACTAAGTTCTATCTTAAAAAGGTCAACTTTAATTCACACA | 1899 |      |      |      |      |      |      |      |      |  |

|         | 1910                  | 1920                                                                       | 1930 | 1940 | 1950 | 1960 | 1970 | 1980 | 1990 | 2000 |  |
|---------|-----------------------|----------------------------------------------------------------------------|------|------|------|------|------|------|------|------|--|
| Col-0   | AGAAATCNNNATGAGATGTGT | TTTTGTTTATGGTTTCTGTCTTCTCATAGTTCTCCTTATAAACCATTTGAAGGTATTTACTATTTTCTTTAAAC | 1998 |      |      |      |      |      |      |      |  |
| C24     | AGAAATCNNNATGAGATGTGT | TTTTGTTTATGGTTTCTGTCTTCTCATAGTTCTCCTTATAAACCATTTGAAGGTATTTACTATTTTCTTTAAAC | 1997 |      |      |      |      |      |      |      |  |
| Ca-0    | AGAAATCNNNATGAGATGTGT | TTTTGTTTATGGTTTCTGTCTTCTCATAGTTCTCCTTATAAACCATTTGAAGGTATTTACTATTTTCTTTAAAC | 1996 |      |      |      |      |      |      |      |  |
| Gie-0   | AGAAATCNNNATGAGATGTGT | TTTTGTTTATGGTTTCTGTCTTCTCATAGTTCTCCTTATAAACCATTTGAAGGTATTTACTATTTTCTTTAAAC | 1987 |      |      |      |      |      |      |      |  |
| Old-1   | AGAAATCNNNATGAGATGTGT | TTTTGTTTATGGTTTCTGTCTTCTCATAGTTCTCCTTATAAACCATTTGAAGGTATTTACTATTTTCTTTAAAC | 1891 |      |      |      |      |      |      |      |  |
| Pog-0   | AGAAATCNNNATGAGATGTGT | TTTTGTTTATGGTTTCTGTCTTCTCATAGTTCTCCTTATAAACCATTTGAAGGTATTTACTATTTTCTTTAAAC | 1727 |      |      |      |      |      |      |      |  |
| Ws-0    | AGAAATCNNNATGAGATGTGT | TTTTGTTTATGGTTTCTGTCTTCTCATAGTTCTCCTTATAAACCATTTGAAGGTATTTACTATTTTCTTTAAAC | 1989 |      |      |      |      |      |      |      |  |
| Da-1-12 | AGAAATCNNNATGAGATGTGT | TTTTGTTTATGGTTTCTGTCTTCTCATAGTTCTCCTTATAAACCATTTGAAGGTATTTACTATTTTCTTTAAAC | 2000 |      |      |      |      |      |      |      |  |
| Mz-0    | AGAAATCNNNATGAGATGTGT | TTTTGTTTATGGTTTCTGTCTTCTCATAGTTCTCCTTATAAACCATTTGAAGGTATTTACTATTTTCTTTAAAC | 1864 |      |      |      |      |      |      |      |  |
| Wa-1    | AGAAATCNNNATGAGATGTGT | TTTTGTTTATGGTTTCTGTCTTCTCATAGTTCTCCTTATAAACCATTTGAAGGTATTTACTATTTTCTTTAAAC | 2000 |      |      |      |      |      |      |      |  |
| La-0    | AGAAATCNNNATGAGATGTGT | TTTTGTTTATGGTTTCTGTCTTCTCATAGTTCTCCTTATAAACCATTTGAAGGTATTTACTATTTTCTTTAAAC | 1999 |      |      |      |      |      |      |      |  |

Supplementary Figure S2  
(Continued)

|         | 2010   | 2020   | 2030   | 2040    | 2050  | 2060     | 2070   | 2080    | 2090   | 2100   |        |        |         |         |          |      |
|---------|--------|--------|--------|---------|-------|----------|--------|---------|--------|--------|--------|--------|---------|---------|----------|------|
| Col-0   | TACAGT | GATTGT | TATGGT | TCAAGAA | TTGGT | TTTCTACA | AAACAT | GCAATAT | TCGAGT | TTGAAT | TCATGT | GGTCAC | GAGAACA | ATTACAG | TATACAAA | 2098 |
| C24     | TACAGT | GATTGT | TATGGT | TCAAGAA | TTGGT | TTTCTACA | AAACAT | GCAATAT | TCGAGT | TTGAAT | TCATGT | GGTCAC | GAGAACA | ATTACAG | TATACAAA | 2097 |
| Ca-0    | TACAGT | GATTGT | TATGGT | TCAAGAA | TTGGT | TTTCTACA | AAACAT | GCAATAT | TCGAGT | TTGAAT | TCATGT | GGTCAC | GAGAACA | ATTACAG | TATACAAA | 2096 |
| Gie-0   | TACAGT | GATTGT | TATGGT | TCAAGAA | TTGGT | TTTCTACA | AAACAT | GCAATAT | TCGAGT | TTGAAT | TCATGT | GGTCAC | GAGAACA | ATTACAG | TATACAAA | 2087 |
| Old-1   | TACAGT | GATTGT | TATGGT | TCAAGAA | TTGGT | TTTCTACA | AAACAT | GCAATAT | TCGAGT | TTGAAT | TCATGT | GGTCAC | GAGAACA | ATTACAG | TATACAAA | 1991 |
| Pog-0   | TACAGT | GATTGT | TATGGT | TCAAGAA | TTGGT | TTTCTACA | AAACAT | GCAATAT | TCGAGT | TTGAAT | TCATGT | GGTCAC | GAGAACA | ATTACAG | TATACAAA | 1827 |
| Ws-0    | TACAGT | GATTGT | TATGGT | TCAAGAA | TTGGT | TTTCTACA | AAACAT | GCAATAT | TCGAGT | TTGAAT | TCATGT | GGTCAC | GAGAACA | ATTACAG | TATACAAA | 2089 |
| Da-1-12 | TACAGT | GATTGT | TATGGT | TCAAGAA | TTGGT | TTTCTACA | AAACAT | GCAATAT | TCGAGT | TTGAAT | TCATGT | GGTCAC | GAGAACA | ATTACAG | TATACAAA | 2100 |
| Mz-0    | TACAGT | GATTGT | TATGGT | TCAAGAA | TTGGT | TTTCTACA | AAACAT | GCAATAT | TCGAGT | TTGAAT | TCATGT | GGTCAC | GAGAACA | ATTACAG | TATACAAA | 1964 |
| Wa-1    | TACAGT | GATTGT | TATGGT | TCAAGAA | TTGGT | TTTCTACA | AAACAT | GCAATAT | TCGAGT | TTGAAT | TCATGT | GGTCAC | GAGAACA | ATTACAG | TATACAAA | 2100 |
| La-0    | TACAGT | GATTGT | TATGGT | TCAAGAA | TTGGT | TTTCTACA | AAACAT | GCAATAT | TCGAGT | TTGAAT | TCATGT | GGTCAC | GAGAACA | ATTACAG | TATACAAA | 2099 |

|         | 2110    | 2120    | 2130   | 2140   | 2150    | 2160   | 2170   | 2180    | 2190    | 2200    |         |         |          |          |       |      |
|---------|---------|---------|--------|--------|---------|--------|--------|---------|---------|---------|---------|---------|----------|----------|-------|------|
| Col-0   | GTACTAG | TATGCAT | GGTCTG | TAAAAA | TAGTATT | TATGAT | CAAAGT | AATTTCT | CAATGAT | AATTGAT | GAGACAT | AAACATT | TATATTTT | CAATTAGT | CATTA | 2198 |
| C24     | GTACTAG | TATGCAT | GGTCTG | TAAAAA | TAGTATT | TATGAT | CAAAGT | AATTTCT | CAATGAT | AATTGAT | GAGACAT | AAACATT | TATATTTT | CAATTAGT | CATTA | 2197 |
| Ca-0    | GTACTAG | TATGCAT | GGTCTG | TAAAAA | TAGTATT | TATGAT | CAAAGT | AATTTCT | CAATGAT | AATTGAT | GAGACAT | AAACATT | TATATTTT | CAATTAGT | CATTA | 2196 |
| Gie-0   | GTACTAG | TATGCAT | GGTCTG | TAAAAA | TAGTATT | TATGAT | CAAAGT | AATTTCT | CAATGAT | AATTGAT | GAGACAT | AAACATT | TATATTTT | CAATTAGT | CATTA | 2187 |
| Old-1   | GTACTAG | TATGCAT | GGTCTG | TAAAAA | TAGTATT | TATGAT | CAAAGT | AATTTCT | CAATGAT | AATTGAT | GAGACAT | AAACATT | TATATTTT | CAATTAGT | CATTA | 2091 |
| Pog-0   | GTACTAG | TATGCAT | GGTCTG | TAAAAA | TAGTATT | TATGAT | CAAAGT | AATTTCT | CAATGAT | AATTGAT | GAGACAT | AAACATT | TATATTTT | CAATTAGT | CATTA | 1927 |
| Ws-0    | GTACTAG | TATGCAT | GGTCTG | TAAAAA | TAGTATT | TATGAT | CAAAGT | AATTTCT | CAATGAT | AATTGAT | GAGACAT | AAACATT | TATATTTT | CAATTAGT | CATTA | 2189 |
| Da-1-12 | GTACTAG | TATGCAT | GGTCTG | TAAAAA | TAGTATT | TATGAT | CAAAGT | AATTTCT | CAATGAT | AATTGAT | GAGACAT | AAACATT | TATATTTT | CAATTAGT | CATTA | 2200 |
| Mz-0    | GTACTAG | TATGCAT | GGTCTG | TAAAAA | TAGTATT | TATGAT | CAAAGT | AATTTCT | CAATGAT | AATTGAT | GAGACAT | AAACATT | TATATTTT | CAATTAGT | CATTA | 2064 |
| Wa-1    | GTACTAG | TATGCAT | GGTCTG | TAAAAA | TAGTATT | TATGAT | CAAAGT | AATTTCT | CAATGAT | AATTGAT | GAGACAT | AAACATT | TATATTTT | CAATTAGT | CATTA | 2200 |
| La-0    | GTACTAG | TATGCAT | GGTCTG | TAAAAA | TAGTATT | TATGAT | CAAAGT | AATTTCT | CAATGAT | AATTGAT | GAGACAT | AAACATT | TATATTTT | CAATTAGT | CATTA | 2199 |

|         | 2210     | 2220     | 2230   | 2240    | 2250    | 2260     | 2270   | 2280    | 2290   | 2300    |        |        |        |         |         |      |
|---------|----------|----------|--------|---------|---------|----------|--------|---------|--------|---------|--------|--------|--------|---------|---------|------|
| Col-0   | AAATAAAA | ATTTCTAG | CAAAAT | GTTTGAT | TTTTATT | TGTTTATA | AAGATA | AATTTCT | GGACCT | GGTAAAG | AGGCAT | AATTTT | AAATTT | CAAAAGT | GATTAAT | 2298 |
| C24     | AAATAAAA | ATTTCTAG | CAAAAT | GTTTGAT | TTTTATT | TGTTTATA | AAGATA | AATTTCT | GGACCT | GGTAAAG | AGGCAT | AATTTT | AAATTT | CAAAAGT | GATTAAT | 2297 |
| Ca-0    | AAATAAAA | ATTTCTAG | CAAAAT | GTTTGAT | TTTTATT | TGTTTATA | AAGATA | AATTTCT | GGACCT | GGTAAAG | AGGCAT | AATTTT | AAATTT | CAAAAGT | GATTAAT | 2296 |
| Gie-0   | AAATAAAA | ATTTCTAG | CAAAAT | GTTTGAT | TTTTATT | TGTTTATA | AAGATA | AATTTCT | GGACCT | GGTAAAG | AGGCAT | AATTTT | AAATTT | CAAAAGT | GATTAAT | 2287 |
| Old-1   | AAATAAAA | ATTTCTAG | CAAAAT | GTTTGAT | TTTTATT | TGTTTATA | AAGATA | AATTTCT | GGACCT | GGTAAAG | AGGCAT | AATTTT | AAATTT | CAAAAGT | GATTAAT | 2191 |
| Pog-0   | AAATAAAA | ATTTCTAG | CAAAAT | GTTTGAT | TTTTATT | TGTTTATA | AAGATA | AATTTCT | GGACCT | GGTAAAG | AGGCAT | AATTTT | AAATTT | CAAAAGT | GATTAAT | 2027 |
| Ws-0    | AAATAAAA | ATTTCTAG | CAAAAT | GTTTGAT | TTTTATT | TGTTTATA | AAGATA | AATTTCT | GGACCT | GGTAAAG | AGGCAT | AATTTT | AAATTT | CAAAAGT | GATTAAT | 2289 |
| Da-1-12 | AAATAAAA | ATTTCTAG | CAAAAT | GTTTGAT | TTTTATT | TGTTTATA | AAGATA | AATTTCT | GGACCT | GGTAAAG | AGGCAT | AATTTT | AAATTT | CAAAAGT | GATTAAT | 2300 |
| Mz-0    | AAATAAAA | ATTTCTAG | CAAAAT | GTTTGAT | TTTTATT | TGTTTATA | AAGATA | AATTTCT | GGACCT | GGTAAAG | AGGCAT | AATTTT | AAATTT | CAAAAGT | GATTAAT | 2164 |
| Wa-1    | AAATAAAA | ATTTCTAG | CAAAAT | GTTTGAT | TTTTATT | TGTTTATA | AAGATA | AATTTCT | GGACCT | GGTAAAG | AGGCAT | AATTTT | AAATTT | CAAAAGT | GATTAAT | 2300 |
| La-0    | AAATAAAA | ATTTCTAG | CAAAAT | GTTTGAT | TTTTATT | TGTTTATA | AAGATA | AATTTCT | GGACCT | GGTAAAG | AGGCAT | AATTTT | AAATTT | CAAAAGT | GATTAAT | 2299 |

|         | 2310     | 2320      | 2330  | 2340    | 2350     | 2360     | 2370   | 2380   | 2390    | 2400      |        |         |        |            |      |
|---------|----------|-----------|-------|---------|----------|----------|--------|--------|---------|-----------|--------|---------|--------|------------|------|
| Col-0   | GATCGAAT | TAATATTAC | ACAAC | TAAAGAT | TTAGAGAT | TATCTACT | ATATAT | TCTACT | TAAAGAC | GAGAATTAT | CATGAT | TAATATT | TAATAC | TATCTTTAGC | 2398 |
| C24     | GATCGAAT | TAATATTAC | ACAAC | TAAAGAT | TTAGAGAT | TATCTACT | ATATAT | TCTACT | TAAAGAC | GAGAATTAT | CATGAT | TAATATT | TAATAC | TATCTTTAGC | 2397 |
| Ca-0    | GATCGAAT | TAATATTAC | ACAAC | TAAAGAT | TTAGAGAT | TATCTACT | ATATAT | TCTACT | TAAAGAC | GAGAATTAT | CATGAT | TAATATT | TAATAC | TATCTTTAGC | 2396 |
| Gie-0   | GATCGAAT | TAATATTAC | ACAAC | TAAAGAT | TTAGAGAT | TATCTACT | ATATAT | TCTACT | TAAAGAC | GAGAATTAT | CATGAT | TAATATT | TAATAC | TATCTTTAGC | 2387 |
| Old-1   | GATCGAAT | TAATATTAC | ACAAC | TAAAGAT | TTAGAGAT | TATCTACT | ATATAT | TCTACT | TAAAGAC | GAGAATTAT | CATGAT | TAATATT | TAATAC | TATCTTTAGC | 2291 |
| Pog-0   | GATCGAAT | TAATATTAC | ACAAC | TAAAGAT | TTAGAGAT | TATCTACT | ATATAT | TCTACT | TAAAGAC | GAGAATTAT | CATGAT | TAATATT | TAATAC | TATCTTTAGC | 2127 |
| Ws-0    | GATCGAAT | TAATATTAC | ACAAC | TAAAGAT | TTAGAGAT | TATCTACT | ATATAT | TCTACT | TAAAGAC | GAGAATTAT | CATGAT | TAATATT | TAATAC | TATCTTTAGC | 2389 |
| Da-1-12 | GATCGAAT | TAATATTAC | ACAAC | TAAAGAT | TTAGAGAT | TATCTACT | ATATAT | TCTACT | TAAAGAC | GAGAATTAT | CATGAT | TAATATT | TAATAC | TATCTTTAGC | 2400 |
| Mz-0    | GATCGAAT | TAATATTAC | ACAAC | TAAAGAT | TTAGAGAT | TATCTACT | ATATAT | TCTACT | TAAAGAC | GAGAATTAT | CATGAT | TAATATT | TAATAC | TATCTTTAGC | 2264 |
| Wa-1    | GATCGAAT | TAATATTAC | ACAAC | TAAAGAT | TTAGAGAT | TATCTACT | ATATAT | TCTACT | TAAAGAC | GAGAATTAT | CATGAT | TAATATT | TAATAC | TATCTTTAGC | 2400 |
| La-0    | GATCGAAT | TAATATTAC | ACAAC | TAAAGAT | TTAGAGAT | TATCTACT | ATATAT | TCTACT | TAAAGAC | GAGAATTAT | CATGAT | TAATATT | TAATAC | TATCTTTAGC | 2399 |

|         | 2410      | 2420    | 2430   | 2440    | 2450    | 2460   | 2470    | 2480    | 2490    | 2500    |        |        |        |          |      |
|---------|-----------|---------|--------|---------|---------|--------|---------|---------|---------|---------|--------|--------|--------|----------|------|
| Col-0   | TATATCATA | AAGAAAT | TATAAT | ATTCTAA | ATAAAAA | TATTTT | TATCCCT | TTTACAG | AGTTAAT | TAAAGAA | CAATAT | ACGTCA | ACCATT | AGTAAATA | 2498 |
| C24     | TATATCATA | AAGAAAT | TATAAT | ATTCTAA | ATAAAAA | TATTTT | TATCCCT | TTTACAG | AGTTAAT | TAAAGAA | CAATAT | ACGTCA | ACCATT | AGTAAATA | 2497 |
| Ca-0    | TATATCATA | AAGAAAT | TATAAT | ATTCTAA | ATAAAAA | TATTTT | TATCCCT | TTTACAG | AGTTAAT | TAAAGAA | CAATAT | ACGTCA | ACCATT | AGTAAATA | 2496 |
| Gie-0   | TATATCATA | AAGAAAT | TATAAT | ATTCTAA | ATAAAAA | TATTTT | TATCCCT | TTTACAG | AGTTAAT | TAAAGAA | CAATAT | ACGTCA | ACCATT | AGTAAATA | 2487 |
| Old-1   | TATATCATA | AAGAAAT | TATAAT | ATTCTAA | ATAAAAA | TATTTT | TATCCCT | TTTACAG | AGTTAAT | TAAAGAA | CAATAT | ACGTCA | ACCATT | AGTAAATA | 2391 |
| Pog-0   | TATATCATA | AAGAAAT | TATAAT | ATTCTAA | ATAAAAA | TATTTT | TATCCCT | TTTACAG | AGTTAAT | TAAAGAA | CAATAT | ACGTCA | ACCATT | AGTAAATA | 2227 |
| Ws-0    | TATATCATA | AAGAAAT | TATAAT | ATTCTAA | ATAAAAA | TATTTT | TATCCCT | TTTACAG | AGTTAAT | TAAAGAA | CAATAT | ACGTCA | ACCATT | AGTAAATA | 2489 |
| Da-1-12 | TATATCATA | AAGAAAT | TATAAT | ATTCTAA | ATAAAAA | TATTTT | TATCCCT | TTTACAG | AGTTAAT | TAAAGAA | CAATAT | ACGTCA | ACCATT | AGTAAATA | 2500 |
| Mz-0    | TATATCATA | AAGAAAT | TATAAT | ATTCTAA | ATAAAAA | TATTTT | TATCCCT | TTTACAG | AGTTAAT | TAAAGAA | CAATAT | ACGTCA | ACCATT | AGTAAATA | 2364 |
| Wa-1    | TATATCATA | AAGAAAT | TATAAT | ATTCTAA | ATAAAAA | TATTTT | TATCCCT | TTTACAG | AGTTAAT | TAAAGAA | CAATAT | ACGTCA | ACCATT | AGTAAATA | 2500 |
| La-0    | TATATCATA | AAGAAAT | TATAAT | ATTCTAA | ATAAAAA | TATTTT | TATCCCT | TTTACAG | AGTTAAT | TAAAGAA | CAATAT | ACGTCA | ACCATT | AGTAAATA | 2499 |

|         | 2510                                                                                                 | 2520 | 2530 | 2540 | 2550 | 2560 | 2570 | 2580 | 2590 | 2600 |      |
|---------|------------------------------------------------------------------------------------------------------|------|------|------|------|------|------|------|------|------|------|
| Col-0   | CTAAATAGTGAACAATATAATATATAAGTTGACCATCATAAATAGCTTCCTTTTATCATGTTCTTAAATGTGGAAGGTGTGGTTACTCTCTGTATATGTG |      |      |      |      |      |      |      |      |      | 2598 |
| C24     | CTAAATAGTGAACAATATAATATATAAGTTGACCATCATAAATAGCTTCCTTTTATCATGTTCTTAAATGTGGAAGGTGTGGTTACTCTCTGTATATGTG |      |      |      |      |      |      |      |      |      | 2597 |
| Ca-0    | CTAAATAGTGAACAATATAATATATAAGTTGACCATCATAAATAGCTTCCTTTTATCATGTTCTTAAATGTGGAAGGTGTGGTTACTCTCTGTATATGTG |      |      |      |      |      |      |      |      |      | 2596 |
| Gie-0   | CTAAATAGTGAACAATATAATATATAAGTTGACCATCATAAATAGCTTCCTTTTATCATGTTCTTAAATGTGGAAGGTGTGGTTACTCTCTGTATATGTG |      |      |      |      |      |      |      |      |      | 2587 |
| Old-1   | CTAAATAGTGAACAATATAATATATAAGTTGACCATCATAAATAGCTTCCTTTTATCATGTTCTTAAATGTGGAAGGTGTGGTTACTCTCTGTATATGTG |      |      |      |      |      |      |      |      |      | 2491 |
| Pog-0   | CTAAATAGTGAACAATATAATATATAAGTTGACCATCATAAATAGCTTCCTTTTATCATGTTCTTAAATGTGGAAGGTGTGGTTACTCTCTGTATATGTG |      |      |      |      |      |      |      |      |      | 2327 |
| Ws-0    | CTAAATAGTGAACAATATAATATATAAGTTGACCATCATAAATAGCTTCCTTTTATCATGTTCTTAAATGTGGAAGGTGTGGTTACTCTCTGTATATGTG |      |      |      |      |      |      |      |      |      | 2589 |
| Da-1-12 | CTAAATAGTGAACAATATAATATATAAGTTGACCATCATAAATAGCTTCCTTTTATCATGTTCTTAAATGTGGAAGGTGTGGTTACTCTCTGTATATGTG |      |      |      |      |      |      |      |      |      | 2600 |
| Mz-0    | CTAAATAGTGAACAATATAATATATAAGTTGACCATCATAAATAGCTTCCTTTTATCATGTTCTTAAATGTGGAAGGTGTGGTTACTCTCTGTATATGTG |      |      |      |      |      |      |      |      |      | 2464 |
| Wa-1    | CTAAATAGTGAACAATATAATATATAAGTTGACCATCATAAATAGCTTCCTTTTATCATGTTCTTAAATGTGGAAGGTGTGGTTACTCTCTGTATATGTG |      |      |      |      |      |      |      |      |      | 2600 |
| La-0    | CTAAATAGTGAACAATATAATATATAAGTTGACCATCATAAATAGCTTCCTTTTATCATGTTCTTAAATGTGGAAGGTGTGGTTACTCTCTGTATATGTG |      |      |      |      |      |      |      |      |      | 2599 |

|         | 2610                                                                                                | 2620 | 2630 | 2640 | 2650 | 2660 | 2670 | 2680 | 2690 | 2700 |      |
|---------|-----------------------------------------------------------------------------------------------------|------|------|------|------|------|------|------|------|------|------|
| Col-0   | TATATACCCCTCCTTCAAAGTTATCTTCGAAATAATATATATGTGTATAAACTCTCTAACTATTACTAATCGCAAAATGCAGTATTGCGACAAGAAAAA |      |      |      |      |      |      |      |      |      | 2698 |
| C24     | TATATACCCCTCCTTCAAAGTTATCTTCGAAATAATATATATGTGTATAAACTCTCTAACTATTACTAATCGCAAAATGCAGTATTGCGACAAGAAAAA |      |      |      |      |      |      |      |      |      | 2697 |
| Ca-0    | TATATACCCCTCCTTCAAAGTTATCTTCGAAATAATATATATGTGTATAAACTCTCTAACTATTACTAATCGCAAAATGCAGTATTGCGACAAGAAAAA |      |      |      |      |      |      |      |      |      | 2694 |
| Gie-0   | TATATACCCCTCCTTCAAAGTTATCTTCGAAATAATATATATGTGTATAAACTCTCTAACTATTACTAATCGCAAAATGCAGTATTGCGACAAGAAAAA |      |      |      |      |      |      |      |      |      | 2687 |
| Old-1   | TATATACCCCTCCTTCAAAGTTATCTTCGAAATAATATATATGTGTATAAACTCTCTAACTATTACTAATCGCAAAATGCAGTATTGCGACAAGAAAAA |      |      |      |      |      |      |      |      |      | 2591 |
| Pog-0   | TATATACCCCTCCTTCAAAGTTATCTTCGAAATAATATATATGTGTATAAACTCTCTAACTATTACTAATCGCAAAATGCAGTATTGCGACAAGAAAAA |      |      |      |      |      |      |      |      |      | 2427 |
| Ws-0    | TATATACCCCTCCTTCAAAGTTATCTTCGAAATAATATATATGTGTATAAACTCTCTAACTATTACTAATCGCAAAATGCAGTATTGCGACAAGAAAAA |      |      |      |      |      |      |      |      |      | 2689 |
| Da-1-12 | TATATACCCCTCCTTCAAAGTTATCTTCGAAATAATATATATGTGTATAAACTCTCTAACTATTACTAATCGCAAAATGCAGTATTGCGACAAGAAAAA |      |      |      |      |      |      |      |      |      | 2700 |
| Mz-0    | TATATACCCCTCCTTCAAAGTTATCTTCGAAATAATATATATGTGTATAAACTCTCTAACTATTACTAATCGCAAAATGCAGTATTGCGACAAGAAAAA |      |      |      |      |      |      |      |      |      | 2564 |
| Wa-1    | TATATACCCCTCCTTCAAAGTTATCTTCGAAATAATATATATGTGTATAAACTCTCTAACTATTACTAATCGCAAAATGCAGTATTGCGACAAGAAAAA |      |      |      |      |      |      |      |      |      | 2700 |
| La-0    | TATATACCCCTCCTTCAAAGTTATCTTCGAAATAATATATATGTGTATAAACTCTCTAACTATTACTAATCGCAAAATGCAGTATTGCGACAAGAAAAA |      |      |      |      |      |      |      |      |      | 2699 |

|         | 2710                                                                                                   | 2720 | 2730 | 2740 | 2750 | 2760 | 2770 | 2780 | 2790 | 2800 |      |
|---------|--------------------------------------------------------------------------------------------------------|------|------|------|------|------|------|------|------|------|------|
| Col-0   | AATAGTTTATATTCTAAAAATTTACTGCATTATCAAGTATTTATCTAAGTATTCTAAAGTAATAACAGAAGTGGAAAGCTCAGAAGTGGAAACAAGTGCTTT |      |      |      |      |      |      |      |      |      | 2798 |
| C24     | AATAGTTTATATTCTAAAAATTTACTGCATTATCAAGTATTTATCTAAGTATTCTAAAGTAATAACAGAAGTGGAAAGCTCAGAAGTGGAAACAAGTGCTTT |      |      |      |      |      |      |      |      |      | 2797 |
| Ca-0    | AATAGTTTATATTCTAAAAATTTACTGCATTATCAAGTATTTATCTAAGTATTCTAAAGTAATAACAGAAGTGGAAAGCTCAGAAGTGGAAACAAGTGCTTT |      |      |      |      |      |      |      |      |      | 2794 |
| Gie-0   | AATAGTTTATATTCTAAAAATTTACTGCATTATCAAGTATTTATCTAAGTATTCTAAAGTAATAACAGAAGTGGAAAGCTCAGAAGTGGAAACAAGTGCTTT |      |      |      |      |      |      |      |      |      | 2787 |
| Old-1   | AATAGTTTATATTCTAAAAATTTACTGCATTATCAAGTATTTATCTAAGTATTCTAAAGTAATAACAGAAGTGGAAAGCTCAGAAGTGGAAACAAGTGCTTT |      |      |      |      |      |      |      |      |      | 2691 |
| Pog-0   | AATAGTTTATATTCTAAAAATTTACTGCATTATCAAGTATTTATCTAAGTATTCTAAAGTAATAACAGAAGTGGAAAGCTCAGAAGTGGAAACAAGTGCTTT |      |      |      |      |      |      |      |      |      | 2527 |
| Ws-0    | AATAGTTTATATTCTAAAAATTTACTGCATTATCAAGTATTTATCTAAGTATTCTAAAGTAATAACAGAAGTGGAAAGCTCAGAAGTGGAAACAAGTGCTTT |      |      |      |      |      |      |      |      |      | 2789 |
| Da-1-12 | AATAGTTTATATTCTAAAAATTTACTGCATTATCAAGTATTTATCTAAGTATTCTAAAGTAATAACAGAAGTGGAAAGCTCAGAAGTGGAAACAAGTGCTTT |      |      |      |      |      |      |      |      |      | 2800 |
| Mz-0    | AATAGTTTATATTCTAAAAATTTACTGCATTATCAAGTATTTATCTAAGTATTCTAAAGTAATAACAGAAGTGGAAAGCTCAGAAGTGGAAACAAGTGCTTT |      |      |      |      |      |      |      |      |      | 2664 |
| Wa-1    | AATAGTTTATATTCTAAAAATTTACTGCATTATCAAGTATTTATCTAAGTATTCTAAAGTAATAACAGAAGTGGAAAGCTCAGAAGTGGAAACAAGTGCTTT |      |      |      |      |      |      |      |      |      | 2800 |
| La-0    | AATAGTTTATATTCTAAAAATTTACTGCATTATCAAGTATTTATCTAAGTATTCTAAAGTAATAACAGAAGTGGAAAGCTCAGAAGTGGAAACAAGTGCTTT |      |      |      |      |      |      |      |      |      | 2799 |

|         | 2810                                                                                                | 2820 | 2830 | 2840 | 2850 | 2860 | 2870 | 2880 | 2890 | 2900 |      |
|---------|-----------------------------------------------------------------------------------------------------|------|------|------|------|------|------|------|------|------|------|
| Col-0   | CTTAGGGACATTTCCCTGGGAAATGTGAACATGACGCAAAACGCAAACTACGATGCAAAAGAAGACGATGCAAGAAGACATTAGCGTAAAATACAGCTT |      |      |      |      |      |      |      |      |      | 2898 |
| C24     | CTTAGGGACATTTCCCTGGGAAATGTGAACATGACGCAAAACGCAAACTACGATGCAAAAGAAGACGATGCAAGAAGACATTAGCGTAAAATACAGCTT |      |      |      |      |      |      |      |      |      | 2897 |
| Ca-0    | CTTAGGGACATTTCCCTGGGAAATGTGAACATGACGCAAAACGCAAACTACGATGCAAAAGAAGACGATGCAAGAAGACATTAGCGTAAAATACAGCTT |      |      |      |      |      |      |      |      |      | 2894 |
| Gie-0   | CTTAGGGACATTTCCCTGGGAAATGTGAACATGACGCAAAACGCAAACTACGATGCAAAAGAAGACGATGCAAGAAGACATTAGCGTAAAATACAGCTT |      |      |      |      |      |      |      |      |      | 2887 |
| Old-1   | CTTAGGGACATTTCCCTGGGAAATGTGAACATGACGCAAAACGCAAACTACGATGCAAAAGAAGACGATGCAAGAAGACATTAGCGTAAAATACAGCTT |      |      |      |      |      |      |      |      |      | 2791 |
| Pog-0   | CTTAGGGACATTTCCCTGGGAAATGTGAACATGACGCAAAACGCAAACTACGATGCAAAAGAAGACGATGCAAGAAGACATTAGCGTAAAATACAGCTT |      |      |      |      |      |      |      |      |      | 2624 |
| Ws-0    | CTTAGGGACATTTCCCTGGGAAATGTGAACATGACGCAAAACGCAAACTACGATGCAAAAGAAGACGATGCAAGAAGACATTAGCGTAAAATACAGCTT |      |      |      |      |      |      |      |      |      | 2889 |
| Da-1-12 | CTTAGGGACATTTCCCTGGGAAATGTGAACATGACGCAAAACGCAAACTACGATGCAAAAGAAGACGATGCAAGAAGACATTAGCGTAAAATACAGCTT |      |      |      |      |      |      |      |      |      | 2900 |
| Mz-0    | CTTAGGGACATTTCCCTGGGAAATGTGAACATGACGCAAAACGCAAACTACGATGCAAAAGAAGACGATGCAAGAAGACATTAGCGTAAAATACAGCTT |      |      |      |      |      |      |      |      |      | 2764 |
| Wa-1    | CTTAGGGACATTTCCCTGGGAAATGTGAACATGACGCAAAACGCAAACTACGATGCAAAAGAAGACGATGCAAGAAGACATTAGCGTAAAATACAGCTT |      |      |      |      |      |      |      |      |      | 2900 |
| La-0    | CTTAGGGACATTTCCCTGGGAAATGTGAACATGACGCAAAACGCAAACTACGATGCAAAAGAAGACGATGCAAGAAGACATTAGCGTAAAATACAGCTT |      |      |      |      |      |      |      |      |      | 2899 |

|         | 2910                                                                                              | 2920 | 2930 | 2940 | 2950 | 2960 | 2970 | 2980 | 2990 | 3000 |      |
|---------|---------------------------------------------------------------------------------------------------|------|------|------|------|------|------|------|------|------|------|
| Col-0   | TAAATGAATATTTGTGATAAATTTGTTTTCTTCAATTAATTTGTGCTTAAATTATCACTGTTTCATAGGTATATAGATTTTGGTTTTGGAGTTGTTA |      |      |      |      |      |      |      |      |      | 2998 |
| C24     | TAAATGAATATTTGTGATAAATTTGTTTTCTTCAATTAATTTGTGCTTAAATTATCACTGTTTCATAGGTATATAGATTTTGGTTTTGGAGTTGTTA |      |      |      |      |      |      |      |      |      | 2997 |
| Ca-0    | TAAATGAATATTTGTGATAAATTTGTTTTCTTCAATTAATTTGTGCTTAAATTATCACTGTTTCATAGGTATATAGATTTTGGTTTTGGAGTTGTTA |      |      |      |      |      |      |      |      |      | 2994 |
| Gie-0   | TAAATGAATATTTGTGATAAATTTGTTTTCTTCAATTAATTTGTGCTTAAATTATCACTGTTTCATAGGTATATAGATTTTGGTTTTGGAGTTGTTA |      |      |      |      |      |      |      |      |      | 2987 |
| Old-1   | TAAATGAATATTTGTGATAAATTTGTTTTCTTCAATTAATTTGTGCTTAAATTATCACTGTTTCATAGGTATATAGATTTTGGTTTTGGAGTTGTTA |      |      |      |      |      |      |      |      |      | 2891 |
| Pog-0   | TAAATGAATATTTGTGATAAATTTGTTTTCTTCAATTAATTTGTGCTTAAATTATCACTGTTTCATAGGTATATAGATTTTGGTTTTGGAGTTGTTA |      |      |      |      |      |      |      |      |      | 2724 |
| Ws-0    | TAAATGAATATTTGTGATAAATTTGTTTTCTTCAATTAATTTGTGCTTAAATTATCACTGTTTCATAGGTATATAGATTTTGGTTTTGGAGTTGTTA |      |      |      |      |      |      |      |      |      | 2989 |
| Da-1-12 | TAAATGAATATTTGTGATAAATTTGTTTTCTTCAATTAATTTGTGCTTAAATTATCACTGTTTCATAGGTATATAGATTTTGGTTTTGGAGTTGTTA |      |      |      |      |      |      |      |      |      | 3000 |
| Mz-0    | TAAATGAATATTTGTGATAAATTTGTTTTCTTCAATTAATTTGTGCTTAAATTATCACTGTTTCATAGGTATATAGATTTTGGTTTTGGAGTTGTTA |      |      |      |      |      |      |      |      |      | 2864 |
| Wa-1    | TAAATGAATATTTGTGATAAATTTGTTTTCTTCAATTAATTTGTGCTTAAATTATCACTGTTTCATAGGTATATAGATTTTGGTTTTGGAGTTGTTA |      |      |      |      |      |      |      |      |      | 3000 |
| La-0    | TAAATGAATATTTGTGATAAATTTGTTTTCTTCAATTAATTTGTGCTTAAATTATCACTGTTTCATAGGTATATAGATTTTGGTTTTGGAGTTGTTA |      |      |      |      |      |      |      |      |      | 2999 |

|         | 3010                                                                                         | 3020 | 3030 | 3040 | 3050 | 3060 | 3070 | 3080 | 3090 |      |
|---------|----------------------------------------------------------------------------------------------|------|------|------|------|------|------|------|------|------|
| Col-0   | AACCAAGCATT TTTTACAATAGCAAATTCACCTTTATCAAAAGTTTGACAATTGCATTCAAAGGGCGAGAGGGTCTGAAATTCCTAGCAAT |      |      |      |      |      |      |      |      | 3091 |
| C24     | AACCAAGCATT TTTTACAATAGCAAATTCACCTTTATCAAAAGTTTGACAATTGCATTCAAAGGGCGAGAGGGTCTGAAATTCCTAGCAAT |      |      |      |      |      |      |      |      | 3090 |
| Ca-0    | AACCAAGCATT TTTTACAATAGCAAATTCACCTTTATCAAAAGTTTGACAATTGCATTCAAAGGGCGAGAGGGTCTGAAATTCCTAGCAAT |      |      |      |      |      |      |      |      | 3087 |
| Gie-0   | AACCAAGCATT TTTTACAATAGCAAATTCACCTTTATCAAAAGTTTGACAATTGCATTCAAAGGGCGAGAGGGTCTGAAATTCCTAGCAAT |      |      |      |      |      |      |      |      | 3080 |
| Old-1   | AACCAAGCATT TTTTACAATAGCAAATTCACCTTTATCAAAAGTTTGACAATTGCATTCAAAGGGCGAGAGGGTCTGAAATTCCTAGCAAT |      |      |      |      |      |      |      |      | 2984 |
| Pog-0   | AACCAAGCATT TTTTACAATAGCAAATTCACCTTTATCAAAAGTTTGACAATTGCATTCAAAGGGCGAGAGGGTCTGAAATTCCTAGCAAT |      |      |      |      |      |      |      |      | 2817 |
| Ws-0    | AACCAAGCATT TTTTACAATAGCAAATTCACCTTATCAAAAGTTTGACAATTGCATTCAAAGGGCGAGAGGGTCTGAAATTCCTAGCAAT  |      |      |      |      |      |      |      |      | 3082 |
| Da-1-12 | AACCAAGCATT TTTTACAATAGCAAATTCACCTTTATCAAAAGTTTGACAATTGCATTCAAAGGGCGAGAGGGTCTGAAATTCCTAGCAAT |      |      |      |      |      |      |      |      | 3093 |
| Mz-0    | AACCAAGCATT TTTTACAATAGCAAATTCACCTTTATCAAAAGTTTGACAATTGCATTCAAAGGGCGAGAGGGTCTGAAATTCCTAGCAAT |      |      |      |      |      |      |      |      | 2957 |
| Wa-1    | AACCAAGCATT TTTTACAATAGCAAATTCACCTTTATCAAAAGTTTGACAATTGCATTCAAAGGGCGAGAGGGTCTGAAATTCCTAGCAAT |      |      |      |      |      |      |      |      | 3093 |
| La-0    | AACCAAGCATT TTTTACAATAGCAAATTCACCTTTATCAAAAGTTTGACAATTGCATTCAAAGGGCGAGAGGGTCTGAAATTCCTAGCAAT |      |      |      |      |      |      |      |      | 3092 |

Alignment of nucleotide sequences of *SCR-A* among *A. thaliana* accessions.

Supplementary Figure S2  
(Continued)
